# Supplementary material
Source: MDPI journal article supplement (https://www.mdpi.com/2227-9717/9/6/1046)
Supplement: s1 [file s1]

# Modelling and Cost Estimation for Conversion of Green Methanol to Renewable Liquid Transport Fuels via Olefin Oligomerisation

Jenna Ruokonen, Harri Nieminen, Ahmed Rufai Dahiru, Arto Laari, Tuomas Koiranen, Petteri Laaksonen, Ari Vuokila and Mika Huuhtanen.

The Supplementary Materials includes the input specifications and the output values of the Aspen Plus simulation model. The components selected for the system are first shown in Table S1. Next, reactions considered in each reactor are shown in Table S2-Table S5. Equipment operations are specified in Table S6. The results of the model are shown in Table S7 and Table S8 of which the former lists the purchased equipment costs calculated by APEA, and the latter shows the complete stream table.

## 1. Component specifications

**Table S1.** Component specifications of the MTO-MOGD model.

| Component ID | Type         | Component name             | Alias    |
|--------------|--------------|----------------------------|----------|
| Methanol     | Conventional | METHANOL                   | CH4O     |
| DME          | Conventional | DIMETHYL-ETHER             | C2H6O-1  |
| Water        | Conventional | WATER                      | H2O      |
| Methane      | Conventional | METHANE                    | CH4      |
| Ethane       | Conventional | ETHANE                     | C2H6     |
| Ethylene     | Conventional | ETHYLENE                   | C2H4     |
| Propane      | Conventional | PROPANE                    | C3H8     |
| Propylene    | Conventional | PROPYLENE                  | C3H6-2   |
| n-Butane     | Conventional | N-BUTANE                   | C4H10-1  |
| i-Butane     | Conventional | ISOBUTANE                  | C4H10-2  |
| Butene       | Conventional | 1-BUTENE                   | C4H8-1   |
| n-Pentane    | Conventional | N-PENTANE                  | C5H12-1  |
| i-Pentane    | Conventional | 2-METHYL-BUTANE            | C5H12-2  |
| Cyclopentane | Conventional | CYCLOPENTANE               | C5H10-1  |
| Pentene      | Conventional | 1-PENTENE                  | C5H10-2  |
| n-Hexane     | Conventional | N-HEXANE                   | C6H14-1  |
| i-Hexane     | Conventional | 2-METHYL-PENTANE           | C6H14-2  |
| Cyclohexane  | Conventional | CYCLOHEXANE                | C6H12-1  |
| Hexene       | Conventional | 1-HEXENE                   | C6H12-3  |
| n-Octane     | Conventional | N-OCTANE                   | C8H18-1  |
| i-Octane     | Conventional | 2,2,4-TRIMETHYLPENTANE     | C8H18-13 |
| Octene       | Conventional | 1-OCTENE                   | C8H16-16 |
| Benzene      | Conventional | BENZENE                    | C6H6     |
| Durene       | Conventional | 1,2,4,5-TETRAMETHYLBENZENE | C10H14-9 |

|              |              |                             |           |
|--------------|--------------|-----------------------------|-----------|
| Prehnitene   | Conventional | 1,2,3,4-TETRAMETHYL-BENZENE | C10H14-E7 |
| i-Durene     | Conventional | 1,2,3,5-TETRAMETHYL-BENZENE | C10H14-E6 |
| n-Dodecane   | Conventional | N-DODECANE                  | C12H26    |
| i-Dodecane   | Conventional | 2-METHYLNUNDECANE           | C12H26-N9 |
| Dodecene     | Conventional | 1-DODECENE                  | C12H24-2  |
| n-Hexadecane | Conventional | N-HEXADECANE                | C16H34    |
| i-Hexadecane | Conventional | 2-METHYLPENTADECANE         | C16H34-N1 |
| Hexadecene   | Conventional | 1-HEXADECENE                | C16H32-2  |
| n-Octadecane | Conventional | N-OCTADECANE                | C18H38    |
| i-Octadecane | Conventional | 16-METHYLHEPTADECANE        | C18H38-N1 |
| Octadecene   | Conventional | 1-OCTADECENE                | C18H36-1  |
| n-Eicosane   | Conventional | N-EICOSANE                  | C20H42    |
| i-Eicosane   | Conventional | 18-METHYLNONADECAN          | C20H42-N3 |
| Eicosene     | Conventional | 1-EICOSENE                  | C20H40-D1 |
| Hydrogen     | Conventional | HYDROGEN                    | H2        |

---

## 2. Reaction specifications

Table S2. Reaction specifications of the MTO reactor R-101, and standard reaction enthalpies calculated from literature values [29] and estimated by Aspen Plus.

| Reaction No. | Specification type    | Fractional conversion | Fractional conversion of component | Stoichiometry                                 | $\Delta H_r^0$ , kJ/mol |        |
|--------------|-----------------------|-----------------------|------------------------------------|-----------------------------------------------|-------------------------|--------|
|              |                       |                       |                                    |                                               | Calculated              | Aspen  |
| 1            | Fractional conversion | 0.99                  | Methanol                           | 2 Methanol --> DME + Water                    | -15.9                   | -23.9  |
| 2            | Fractional conversion | 0.30                  | DME                                | DME --> Ethylene + Water                      | -5.3                    | -5.2   |
| 3            | Fractional conversion | 1                     | DME                                | 3 DME --> 2 Propylene + 3 Water               | -132.4                  | -132.9 |
| 4            | Fractional conversion | 0.80                  | Ethylene                           | 2 Ethylene --> Butene                         | -105.6                  | -105.6 |
| 5            | Fractional conversion | 0.45                  | Propylene                          | 2 Propylene --> Hexene                        | -82.8                   | -82.3  |
| 6            | Fractional conversion | 0.45                  | Ethylene                           | Ethylene + Propylene --> Pentene              | -95.8                   | -94.5  |
| 7            | Fractional conversion | 0.50                  | Hexene                             | Hexene --> Benzene + 3 Hydrogen               | 124.9                   | 124.8  |
| 8            | Fractional conversion | 1                     | Methanol                           | Benzene + 4 Methanol --> Durene + 4 Water     | -277.3                  | -293.5 |
| 9            | Fractional conversion | 0.15                  | Butene                             | 2 Butene + 2 Hydrogen --> n-Butane + i-Butane | -258.5                  | -260.0 |
| 10           | Fractional conversion | 0.075                 | Propylene                          | Propylene + Hydrogen --> Propane              | -125.1                  | -125.0 |
| 11           | Fractional conversion | 0.15                  | Ethylene                           | Ethylene + Hydrogen --> Ethane                | -136.5                  | -136.4 |
| 12           | Fractional conversion | 0.50                  | Ethylene                           | Ethylene + 2 Hydrogen --> 2 Methane           | -202.2                  | -201.6 |
| 13           | Fractional conversion | 1                     | Hydrogen                           | Benzene + 3 Hydrogen --> Cyclohexane          | -207.5                  | -206.4 |

|    |                       |      |         |                          |       |       |
|----|-----------------------|------|---------|--------------------------|-------|-------|
| 14 | Fractional conversion | 0.50 | Pentene | Pentene --> Cyclopentane | -53.5 | -55.4 |
|----|-----------------------|------|---------|--------------------------|-------|-------|

**Table S3.** Reaction specifications of the hydroisomerisation reactor R-102.

| Reaction No. | Specification type    | Molar extent | Units  | Fractional conversion | Fractional conversion of component | Stoichiometry                       |
|--------------|-----------------------|--------------|--------|-----------------------|------------------------------------|-------------------------------------|
| 1            | Fractional conversion |              |        | 0.49                  | Durene                             | 2 Durene --> Prehnitene + i-Durene  |
| 2            | Molar extent          | 0.015        | kmol/h |                       |                                    | Durene + 5 Hydrogen --> 2 n-Pentane |

**Table S4.** Reaction specifications of the MOGD reactor R-103, and standard reaction enthalpies calculated from literature values [29, 30] and estimated by Aspen Plus.

| Reaction No. | Specification type    | Fractional conversion | Fractional conversion of component | Stoichiometry                    | $\Delta H_r^0$ , kJ/mol |        |
|--------------|-----------------------|-----------------------|------------------------------------|----------------------------------|-------------------------|--------|
|              |                       |                       |                                    |                                  | Calculated              | Aspen  |
| 1            | Fractional conversion | 1                     | Ethylene                           | 2 Ethylene --> Butene            | -105.6                  | -105.6 |
| 2            | Fractional conversion | 1                     | Propylene                          | 2 Propylene --> Hexene           | -82.8                   | -82.3  |
| 3            | Fractional conversion | 1                     | Butene                             | 2 Butene --> Octene              | -81.7                   | -81.3  |
| 4            | Fractional conversion | 0.85                  | Hexene                             | 2 Hexene --> Dodecene            | -81.4                   | -83.3  |
| 5            | Fractional conversion | 0.80                  | Octene                             | 2 Octene --> Hexadecene          | -82.5                   | -88.7  |
| 6            | Fractional conversion | 0.99                  | Hexene                             | Hexene + Dodecene --> Octadecene | -82.0                   | -85.6  |
| 7            | Fractional conversion | 0.99                  | Octene                             | Octene + Dodecene --> Eicosene   | -82.4                   | -86.2  |

**Table S5.** Reaction specifications of the hydrogenation reactor R-104.

| Reaction No. | Specification type    | Fractional conversion | Fractional conversion of component | Stoichiometry                                             |
|--------------|-----------------------|-----------------------|------------------------------------|-----------------------------------------------------------|
| 1            | Fractional conversion | 0.90                  | Dodecene                           | 2 Dodecene + 2 Hydrogen --> n-Dodecane + i-Dodecane       |
| 2            | Fractional conversion | 0.90                  | Hexadecene                         | 2 Hexadecene + 2 Hydrogen --> n-Hexadecane + i-Hexadecane |
| 3            | Fractional conversion | 0.90                  | Octadecene                         | 2 Octadecene + 2 Hydrogen --> n-Octadecane + i-Octadecane |
| 4            | Fractional conversion | 0.90                  | Eicosene                           | 2 Eicosene + 2 Hydrogen --> n-Eicosane + i-Eicosane       |

### 3. Equipment specifications

**Table S6.** Equipment specifications of the MTO-MOGD model. Abbreviations used in the table: I, Isentropic; M, Mechanical; RR, Reflux ratio; and DFR, Distillate to feed ratio.

| Name  | Type     | Specification          | T, °C | P, bar | Duty, kW | No. of stages | Efficiency           | Calculation type | Molar RR | Molar DFR | Condenser type | Reboiler type | Pinch, °C | Split fraction | Utility                                 |
|-------|----------|------------------------|-------|--------|----------|---------------|----------------------|------------------|----------|-----------|----------------|---------------|-----------|----------------|-----------------------------------------|
| C-101 | Compr    | Compressor             |       | 15     |          | 1             | 0.80 (I)<br>0.90 (M) | Isentropic       |          |           |                |               |           |                | Electricity                             |
| C-102 | MCompr   | Multi-stage compressor |       | 17     |          | 3             | 0.80 (I)<br>0.90 (M) | Isentropic       |          |           |                |               |           |                | Electricity<br>Cooling water            |
| C-103 | Compr    | Compressor             |       | 16     |          | 1             | 0.80 (I)<br>0.90 (M) | Isentropic       |          |           |                |               |           |                | Electricity                             |
| C-104 | MCompr   | Multi-stage compressor |       | 40     |          | 4             | 0.80 (I)<br>0.90 (M) | Isentropic       |          |           |                |               |           |                | Electricity<br>Cooling water            |
| C-105 | Compr    | Compressor             |       | 40     |          | 1             | 0.80 (I)<br>0.90 (M) | Isentropic       |          |           |                |               |           |                | Electricity                             |
| D-101 | Decanter | Decanter               |       | 2      | 0        |               |                      |                  |          |           |                |               |           |                |                                         |
| DIST1 | RadFrac  | Distillation column    |       | 15     |          | 4             |                      | Equilibrium      | 1.26     | 0.13      | Partial-Vapor  | Kettle        |           |                | Refrigeration                           |
| DIST2 | RadFrac  | Distillation column    |       | 10     |          | 5             |                      | Equilibrium      | 0.012    | 0.99      | Total          | Kettle        |           |                | LP steam<br>Cooling water<br>Fired heat |
| DIST3 | RadFrac  | Distillation column    |       | 5      |          | 4             |                      | Equilibrium      | 0.26     | 0.45      | Partial-Vapor  | Kettle        |           |                | Cooling water<br>HP steam               |
| DIST4 | RadFrac  | Distillation column    |       | 1      |          | 6             |                      | Equilibrium      | 0.36     | 0.54      | Partial-Vapor  | Kettle        |           |                | LP steam generation<br>Fired heat       |
| DIST5 | RadFrac  | Distillation column    |       | 5      |          | 7             |                      | Equilibrium      | 2.31     | 0.30      | Partial-Vapor  | Kettle        |           |                | Refrigeration                           |

|       |        |                |                               |    |                         |   |                     |
|-------|--------|----------------|-------------------------------|----|-------------------------|---|---------------------|
| E-101 | HeatX  | Heat exchanger | 430                           |    | Shortcut countercurrent | 5 | LP steam            |
|       |        |                | Cold stream outlet            |    |                         |   |                     |
| E-102 | Heater | Heater         | 450                           | 2  |                         |   | Fired heat          |
| E-103 | HeatX  | Heat exchanger | 40                            |    | Shortcut countercurrent | 5 |                     |
|       |        |                | Cold stream outlet            |    |                         |   |                     |
| E-104 | Heater | Cooler         | 30                            | 2  |                         |   | Cooling water       |
| E-105 | HeatX  | Heat exchanger | 5                             |    | Shortcut countercurrent | 3 |                     |
|       |        |                | Hot/cold temperature approach |    |                         |   |                     |
| E-106 | Heater | Cooler         | 50                            | 15 |                         |   | Cooling water       |
| E-107 | HeatX  | Heat exchanger | 5                             |    | Shortcut countercurrent | 3 |                     |
|       |        |                | Hot/cold temperature approach |    |                         |   |                     |
| E-108 | Heater | Heater         | 345                           | 17 |                         |   | Fired heat          |
| E-109 | Heater | Cooler         | 135                           | 16 |                         |   | LP steam generation |
| E-110 | Heater | Cooler         | 30                            | 16 |                         |   | Cooling water       |
| E-111 | Heater | Cooler         | 10                            | 16 |                         |   | Refrigeration       |
| E-112 | Heater | Cooler         | 30                            | 1  |                         |   | Cooling water       |
| E-113 | Heater | Heater         | 345                           | 17 |                         |   | Fired heat          |
| E-114 | Heater | Heater         | 200                           | 40 |                         |   | HP steam            |
| E-115 | Heater | Heater         | 300                           | 40 |                         |   | Fired heat          |

|        |        |                        |     |      |   |                     |                     |
|--------|--------|------------------------|-----|------|---|---------------------|---------------------|
| E-116  | Heater | Cooler                 | 135 | 0    |   |                     | LP steam generation |
| E-117  | Heater | Cooler                 | 30  | 0    |   |                     | Cooling water       |
| E-118  | Heater | Cooler                 | 135 | 1    |   |                     | LP steam generation |
| E-119  | Heater | Cooler                 | 30  | 1    |   |                     | Cooling water       |
| E-120  | Heater | Cooler                 | 30  | 1    |   |                     | Cooling water       |
| E-121  | Heater | Cooler                 | 50  | 5    |   |                     | Cooling water       |
| E-122  | Heater | Heater                 | 300 | 40   |   |                     | Fired heat          |
| FLASH1 | Flash2 | Flash column           |     | 2    | 0 |                     |                     |
| FLASH2 | Flash2 | Flash column           |     | 14.4 | 0 |                     |                     |
| FLASH3 | Flash2 | Flash column           |     | 36   | 0 |                     |                     |
| FLASH4 | Flash2 | Flash column           |     | 1    | 0 |                     |                     |
| P-101  | Pump   | Pump                   |     | 2    |   |                     | Electricity         |
| P-102  | Pump   | Pump                   |     | 15   |   |                     | Electricity         |
| P-103  | Pump   | Pump                   |     | 17   |   |                     | Electricity         |
| P-104  | Pump   | Pump                   |     | 40   |   |                     | Electricity         |
| P-105  | Pump   | Pump                   |     | 40   |   |                     | Electricity         |
| R-101  | RStoic | Stoichiometric reactor | 450 | 2    |   | Vapor-Only          | HP steam generation |
| R-102  | RStoic | Stoichiometric reactor | 345 | 16   |   | Vapor-Liquid        | Fired heat          |
| R-103  | RStoic | Stoichiometric reactor | 200 | 39   |   | Vapor-Liquid        | LP steam generation |
| R-104  | RStoic | Stoichiometric reactor | 300 | 40   |   | Vapor-Liquid        | HP steam generation |
| V-101  | Mixer  | Mixing valve           |     | 0    |   |                     |                     |
| V-102  | Mixer  | Mixing valve           |     | 0    |   |                     |                     |
| V-103  | Valve  | Pressure relief valve  |     | 1    |   | Adiabatic flash for |                     |



|       |        |                          |   |  |                                                           |      |
|-------|--------|--------------------------|---|--|-----------------------------------------------------------|------|
|       |        |                          |   |  | specified<br>outlet<br>pressure                           |      |
| V-104 | FSplit | Split valve              |   |  |                                                           | 0.05 |
| V-105 | Mixer  | Mixing valve             | 0 |  |                                                           |      |
| V-106 | Valve  | Pressure relief<br>valve | 5 |  | Adiabatic<br>flash for<br>specified<br>outlet<br>pressure |      |
| V-107 | Valve  | Pressure relief<br>valve | 1 |  | Adiabatic<br>flash for<br>specified<br>outlet<br>pressure |      |
| V-108 | Mixer  | Mixing valve             | 0 |  |                                                           |      |

---

**Table S7.** Equipment sizes and costs. D refers to a vessel diameter and H to height.

| Equipment         | Aspen<br>model | Size              |                   | Number<br>of items | Material factor<br>(f <sub>m</sub> ) | Equipment cost<br>(APEA), \$ <sub>2018</sub> | Purchased cost,<br>€ <sub>2020</sub> |
|-------------------|----------------|-------------------|-------------------|--------------------|--------------------------------------|----------------------------------------------|--------------------------------------|
| C-101             | Compr          | 49                | kW                | 1                  | 1                                    | 782900                                       | 820730                               |
| C-102             | MCompr         | 0.33              | kW                | 1                  | 1.3                                  | 1237600                                      | 1297401                              |
| C-103             | Compr          | 0.03              | kW                | 1                  | 1.3                                  | 675200                                       | 707826                               |
| C-104             | MCompr         | 15                | kW                | 1                  | 1.3                                  | 1498600                                      | 1571012                              |
| C-105             | Compr          | 0.17              | kW                | 1                  | 1.3                                  | 741400                                       | 777224                               |
| D-101             | Decanter       | 1.80              | m <sup>3</sup>    | 1                  | 1                                    | 15200                                        | 15934                                |
| DIST1-cond        | RadFrac        | 3.95              | m <sup>2</sup>    | 1                  | 1                                    | 10200                                        | 10693                                |
| DIST1-cond acc    |                | 1.80              | m <sup>3</sup>    | 1                  | 1                                    | 14300                                        | 14991                                |
| DIST1-reb         |                | 0.57              | m <sup>2</sup>    | 1                  | 1                                    | 13200                                        | 13838                                |
| DIST1-reflux pump |                | 0.37              | m <sup>3</sup> /h | 2                  | 1                                    | 9600                                         | 10064                                |
| DIST1-tower       |                | D=0.46,<br>H=5.49 | m                 | 1                  | 1                                    | 19400                                        | 20337                                |
| DIST2-cond        | RadFrac        | 4.39              | m <sup>2</sup>    | 1                  | 1                                    | 10300                                        | 10798                                |
| DIST2-cond acc    |                | 1.80              | m <sup>3</sup>    | 1                  | 1                                    | 13800                                        | 14467                                |
| DIST2-reb         |                | 12                | m <sup>2</sup>    | 1                  | 1                                    | 18400                                        | 19289                                |
| DIST2-reflux pump |                | 2.27              | m <sup>3</sup> /h | 2                  | 1                                    | 9600                                         | 10064                                |
| DIST2-tower       |                | D=0.46,<br>H=6.71 | m                 | 1                  | 1                                    | 22800                                        | 23902                                |
| DIST3-cond        | RadFrac        | 0.26              | m <sup>2</sup>    | 1                  | 1                                    | 8400                                         | 8806                                 |
| DIST3-cond acc    |                | 1.80              | m <sup>3</sup>    | 1                  | 1                                    | 13300                                        | 13943                                |
| DIST3-reb         |                | 1.23              | m <sup>2</sup>    | 1                  | 1                                    | 13400                                        | 14047                                |
| DIST3-reflux pump |                | 0.16              | m <sup>3</sup> /h | 2                  | 1                                    | 9600                                         | 10064                                |
| DIST3-tower       |                | D=0.46,<br>H=5.49 | m                 | 1                  | 1                                    | 19300                                        | 20233                                |
| DIST4-cond        | RadFrac        | 2.48              | m <sup>2</sup>    | 1                  | 1                                    | 9100                                         | 9540                                 |
| DIST4-cond acc    |                | 1.80              | m <sup>3</sup>    | 1                  | 1                                    | 16500                                        | 17297                                |
| DIST4-reb         |                | 20                | m <sup>2</sup>    | 1                  | 1                                    | 20000                                        | 20966                                |
| DIST4-reflux pump |                | 0.31              | m <sup>3</sup> /h | 2                  | 1                                    | 9600                                         | 10064                                |

|                   |         |                   |                   |   |     |       |       |
|-------------------|---------|-------------------|-------------------|---|-----|-------|-------|
| DIST4-tower       |         | D=0.61,<br>H=7.32 | m                 | 1 | 1   | 36600 | 38369 |
| DIST5-cond        | RadFrac | 3.08              | m <sup>2</sup>    | 1 | 1   | 9200  | 9645  |
| DIST5-cond acc    |         | 1.80              | m <sup>3</sup>    | 1 | 1   | 13300 | 13943 |
| DIST5-reb         |         | 0.68              | m <sup>2</sup>    | 1 | 1   | 13200 | 13838 |
| DIST5-reflux pump |         | 0.30              | m <sup>3</sup> /h | 2 | 1   | 9600  | 10064 |
| DIST5-tower       |         | D=0.46,<br>H=8.53 | m                 | 1 | 1   | 27300 | 28619 |
| E-101             | HeatX   | 69                | m <sup>2</sup>    | 1 | 1.3 | 21700 | 22749 |
| E-102             | Heater  | 16                | m <sup>2</sup>    | 1 | 1.3 | 14400 | 15096 |
| E-103             | HeatX   | 0.52              | m <sup>2</sup>    | 1 | 1   | 8400  | 8806  |
| E-104             | Heater  | 13                | m <sup>2</sup>    | 1 | 1   | 11200 | 11741 |
| E-105             | HeatX   | 1.23              | m <sup>2</sup>    | 1 | 1   | 9100  | 9540  |
| E-106             | Heater  | 3.06              | m <sup>2</sup>    | 1 | 1   | 9200  | 9645  |
| E-107             | HeatX   | 0.49              | m <sup>2</sup>    | 1 | 1.3 | 8500  | 8911  |
| E-108             | Heater  | 0.49              | m <sup>2</sup>    | 1 | 1.3 | 8900  | 9330  |
| E-109             | Heater  | 1.06              | m <sup>2</sup>    | 1 | 1.3 | 9100  | 9540  |
| E-110             | Heater  | 0.49              | m <sup>2</sup>    | 1 | 1.3 | 8400  | 8806  |
| E-111             | Heater  | 0.49              | m <sup>2</sup>    | 1 | 1.3 | 8400  | 8806  |
| E-112             | Heater  | 0.61              | m <sup>2</sup>    | 1 | 1   | 8400  | 8806  |
| E-113             | Heater  | 0.49              | m <sup>2</sup>    | 1 | 1   | 8900  | 9330  |
| E-114             | Heater  | 2.08              | m <sup>2</sup>    | 1 | 1   | 9400  | 9854  |
| E-115             | Heater  | 5.46              | m <sup>2</sup>    | 1 | 1   | 13100 | 13733 |
| E-116             | Heater  | 24                | m <sup>2</sup>    | 1 | 1.3 | 17800 | 18660 |
| E-117             | Heater  | 2.18              | m <sup>2</sup>    | 1 | 1.3 | 9300  | 9749  |
| E-118             | Heater  | 15                | m <sup>2</sup>    | 1 | 1   | 11500 | 12056 |
| E-119             | Heater  | 1.70              | m <sup>2</sup>    | 1 | 1   | 8900  | 9330  |
| E-120             | Heater  | 1.06              | m <sup>2</sup>    | 1 | 1   | 8900  | 9330  |
| E-121             | Heater  | 0.84              | m <sup>2</sup>    | 1 | 1   | 8900  | 9330  |
| E-122             | Heater  | 0.64              | m <sup>2</sup>    | 1 | 1.3 | 9000  | 9435  |
| FLASH1            | Flash2  | 2.40              | m <sup>3</sup>    | 1 | 1   | 16400 | 17192 |

|                         |        |       |                   |   |     |             |             |
|-------------------------|--------|-------|-------------------|---|-----|-------------|-------------|
| FLASH2                  | Flash2 | 2.40  | m <sup>3</sup>    | 1 | 1.3 | 17800       | 18660       |
| FLASH3                  | Flash2 | 2.40  | m <sup>3</sup>    | 1 | 1.3 | 22300       | 23378       |
| FLASH4                  | Flash2 | 2.40  | m <sup>3</sup>    | 1 | 1.3 | 16900       | 17717       |
| P-101                   | Pump   | 4.16  | m <sup>3</sup> /h | 1 | 1.3 | 4300        | 4508        |
| P-102                   | Pump   | 1E-07 | m <sup>3</sup> /h | 1 | 1   | 16300       | 17088       |
| P-103                   | Pump   | 0.05  | m <sup>3</sup> /h | 1 | 1   | 16300       | 17088       |
| P-104                   | Pump   | 2.25  | m <sup>3</sup> /h | 1 | 1   | 57100       | 59859       |
| P-105                   | Pump   | 1.70  | m <sup>3</sup> /h | 1 | 1   | 59600       | 62480       |
| R-101                   | RStoic | 5.56  | m <sup>3</sup>    | 2 | 1.3 | 250400      | 262499      |
| R-102                   | RStoic | 0.05  | m <sup>3</sup>    | 2 | 1.3 | 44600       | 46755       |
| R-103                   | RStoic | 4.26  | m <sup>3</sup>    | 2 | 1.3 | 229800      | 240904      |
| R-104                   | RStoic | 4.47  | m <sup>3</sup>    | 2 | 1.3 | 198400      | 207987      |
| V-101                   | Mixer  |       |                   |   |     |             |             |
| V-102                   | Mixer  |       |                   |   |     |             |             |
| V-103                   | Valve  |       |                   |   |     |             |             |
| V-104                   | FSplit |       |                   |   |     |             |             |
| V-105                   | Mixer  |       |                   |   |     |             |             |
| V-106                   | Valve  |       |                   |   |     |             |             |
| V-107                   | Valve  |       |                   |   |     |             |             |
| V-108                   | Mixer  |       |                   |   |     |             |             |
| Total                   |        |       |                   |   |     | 6502500     | 6816701     |
| Total, 10 <sup>-6</sup> |        |       |                   |   |     | <b>6.50</b> | <b>6.82</b> |

---

#### 4. Stream table

**Table S8.** Stream table of the MTO-MOGD model.

| <b>Stream</b>         |               | <b>1</b>  | <b>2</b>  | <b>3</b>  | <b>4</b>  | <b>5</b>   | <b>6</b>   | <b>7</b>   | <b>8</b>   | <b>9</b>  | <b>10</b> | <b>11</b> | <b>12</b> | <b>13</b> | <b>14</b> | <b>15</b> | <b>16</b> | <b>17</b> | <b>18</b> | <b>19</b> | <b>20</b> |
|-----------------------|---------------|-----------|-----------|-----------|-----------|------------|------------|------------|------------|-----------|-----------|-----------|-----------|-----------|-----------|-----------|-----------|-----------|-----------|-----------|-----------|
| Temperature           | C             | 25        | 25        | 430       | 450       | 450        | 85         | 82         | 30         | 30        | 30        | 33        | 30        | 117       | 125       | 103       | 50        | 66        | 290       | 292       | 315       |
| Pressure              | bar           | 1         | 2         | 2         | 2         | 2          | 2          | 2          | 2          | 2         | 2         | 15        | 2         | 15        | 15        | 15        | 15        | 15        | 10        | 17        | 17        |
| Molar Vapor Fraction  |               | 0         | 0         | 1         | 1         | 1          | 0          | 0          | 0          | 0         | 0         | 0         | 1         | 1         | 1         | 1         | 0         | 0         | 0         | 0         | 0         |
| Molar Liquid Fraction |               | 1         | 1         | 0         | 0         | 0          | 1          | 1          | 1          | 1         | 1         | 1         | 0         | 0         | 0         | 0         | 1         | 1         | 1         | 1         | 1         |
| <b>Mole Flows</b>     | <b>kmol/h</b> | <b>94</b> | <b>94</b> | <b>94</b> | <b>94</b> | <b>118</b> | <b>118</b> | <b>118</b> | <b>118</b> | <b>93</b> | <b>0</b>  | <b>0</b>  | <b>25</b> | <b>25</b> | <b>25</b> | <b>25</b> | <b>25</b> | <b>22</b> | <b>0</b>  | <b>0</b>  | <b>0</b>  |
| Methanol              | kmol/h        | 94        | 94        | 94        | 94        | 0          | 0          | 0          | 0          | 0         | 0         | 0         | 0         | 0         | 0         | 0         | 0         | 0         | 0         | 0         | 0         |
| DME                   | kmol/h        | 0         | 0         | 0         | 0         | 0          | 0          | 0          | 0          | 0         | 0         | 0         | 0         | 0         | 0         | 0         | 0         | 0         | 0         | 0         | 0         |
| Water                 | kmol/h        | 0         | 0         | 0         | 0         | 94         | 94         | 94         | 94         | 93        | 0         | 0         | 0         | 0         | 0         | 0         | 0         | 0         | 0         | 0         | 0         |
| Methane               | kmol/h        | 0         | 0         | 0         | 0         | 1          | 1          | 1          | 1          | 0         | 0         | 0         | 1         | 1         | 1         | 1         | 1         | 0         | 0         | 0         | 0         |
| Ethane                | kmol/h        | 0         | 0         | 0         | 0         | 0          | 0          | 0          | 0          | 0         | 0         | 0         | 0         | 0         | 0         | 0         | 0         | 0         | 0         | 0         | 0         |
| Ethylene              | kmol/h        | 0         | 0         | 0         | 0         | 1          | 1          | 1          | 1          | 0         | 0         | 0         | 1         | 1         | 1         | 1         | 1         | 0         | 0         | 0         | 0         |
| Propane               | kmol/h        | 0         | 0         | 0         | 0         | 1          | 1          | 1          | 1          | 0         | 0         | 0         | 1         | 1         | 1         | 1         | 1         | 1         | 0         | 0         | 0         |
| Propylene             | kmol/h        | 0         | 0         | 0         | 0         | 10         | 10         | 10         | 10         | 0         | 0         | 0         | 10        | 10        | 10        | 10        | 10        | 9         | 0         | 0         | 0         |
| n-Butane              | kmol/h        | 0         | 0         | 0         | 0         | 0          | 0          | 0          | 0          | 0         | 0         | 0         | 0         | 0         | 0         | 0         | 0         | 0         | 0         | 0         | 0         |
| i-Butane              | kmol/h        | 0         | 0         | 0         | 0         | 0          | 0          | 0          | 0          | 0         | 0         | 0         | 0         | 0         | 0         | 0         | 0         | 0         | 0         | 0         | 0         |
| Butene                | kmol/h        | 0         | 0         | 0         | 0         | 5          | 5          | 5          | 5          | 0         | 0         | 0         | 5         | 5         | 5         | 5         | 5         | 5         | 0         | 0         | 0         |
| n-Pentane             | kmol/h        | 0         | 0         | 0         | 0         | 0          | 0          | 0          | 0          | 0         | 0         | 0         | 0         | 0         | 0         | 0         | 0         | 0         | 0         | 0         | 0         |
| i-Pentane             | kmol/h        | 0         | 0         | 0         | 0         | 0          | 0          | 0          | 0          | 0         | 0         | 0         | 0         | 0         | 0         | 0         | 0         | 0         | 0         | 0         | 0         |
| Cyclopentane          | kmol/h        | 0         | 0         | 0         | 0         | 1          | 1          | 1          | 1          | 0         | 0         | 0         | 1         | 1         | 1         | 1         | 1         | 1         | 0         | 0         | 0         |
| Pentene               | kmol/h        | 0         | 0         | 0         | 0         | 1          | 1          | 1          | 1          | 0         | 0         | 0         | 1         | 1         | 1         | 1         | 1         | 1         | 0         | 0         | 0         |
| n-Hexane              | kmol/h        | 0         | 0         | 0         | 0         | 0          | 0          | 0          | 0          | 0         | 0         | 0         | 0         | 0         | 0         | 0         | 0         | 0         | 0         | 0         | 0         |
| i-Hexane              | kmol/h        | 0         | 0         | 0         | 0         | 0          | 0          | 0          | 0          | 0         | 0         | 0         | 0         | 0         | 0         | 0         | 0         | 0         | 0         | 0         | 0         |
| Cyclohexane           | kmol/h        | 0         | 0         | 0         | 0         | 1          | 1          | 1          | 1          | 0         | 0         | 0         | 1         | 1         | 1         | 1         | 1         | 1         | 0         | 0         | 0         |
| Hexene                | kmol/h        | 0         | 0         | 0         | 0         | 2          | 2          | 2          | 2          | 0         | 0         | 0         | 2         | 2         | 2         | 2         | 2         | 2         | 0         | 0         | 0         |

|                   |             |             |             |             |             |             |             |             |             |             |          |          |             |             |             |             |             |             |           |           |           |
|-------------------|-------------|-------------|-------------|-------------|-------------|-------------|-------------|-------------|-------------|-------------|----------|----------|-------------|-------------|-------------|-------------|-------------|-------------|-----------|-----------|-----------|
| n-Octane          | kmol/h      | 0           | 0           | 0           | 0           | 0           | 0           | 0           | 0           | 0           | 0        | 0        | 0           | 0           | 0           | 0           | 0           | 0           | 0         | 0         | 0         |
| i-Octane          | kmol/h      | 0           | 0           | 0           | 0           | 0           | 0           | 0           | 0           | 0           | 0        | 0        | 0           | 0           | 0           | 0           | 0           | 0           | 0         | 0         | 0         |
| Octene            | kmol/h      | 0           | 0           | 0           | 0           | 0           | 0           | 0           | 0           | 0           | 0        | 0        | 0           | 0           | 0           | 0           | 0           | 0           | 0         | 0         | 0         |
| Benzene           | kmol/h      | 0           | 0           | 0           | 0           | 1           | 1           | 1           | 1           | 0           | 0        | 0        | 1           | 1           | 1           | 1           | 1           | 1           | 0         | 0         | 0         |
| Durene            | kmol/h      | 0           | 0           | 0           | 0           | 0           | 0           | 0           | 0           | 0           | 0        | 0        | 0           | 0           | 0           | 0           | 0           | 0           | 0         | 0         | 0         |
| Prehnitene        | kmol/h      | 0           | 0           | 0           | 0           | 0           | 0           | 0           | 0           | 0           | 0        | 0        | 0           | 0           | 0           | 0           | 0           | 0           | 0         | 0         | 0         |
| Isodurene         | kmol/h      | 0           | 0           | 0           | 0           | 0           | 0           | 0           | 0           | 0           | 0        | 0        | 0           | 0           | 0           | 0           | 0           | 0           | 0         | 0         | 0         |
| n-Dodecane        | kmol/h      | 0           | 0           | 0           | 0           | 0           | 0           | 0           | 0           | 0           | 0        | 0        | 0           | 0           | 0           | 0           | 0           | 0           | 0         | 0         | 0         |
| i-Dodecane        | kmol/h      | 0           | 0           | 0           | 0           | 0           | 0           | 0           | 0           | 0           | 0        | 0        | 0           | 0           | 0           | 0           | 0           | 0           | 0         | 0         | 0         |
| Dodecene          | kmol/h      | 0           | 0           | 0           | 0           | 0           | 0           | 0           | 0           | 0           | 0        | 0        | 0           | 0           | 0           | 0           | 0           | 0           | 0         | 0         | 0         |
| n-Hexadecane      | kmol/h      | 0           | 0           | 0           | 0           | 0           | 0           | 0           | 0           | 0           | 0        | 0        | 0           | 0           | 0           | 0           | 0           | 0           | 0         | 0         | 0         |
| i-Hexadecane      | kmol/h      | 0           | 0           | 0           | 0           | 0           | 0           | 0           | 0           | 0           | 0        | 0        | 0           | 0           | 0           | 0           | 0           | 0           | 0         | 0         | 0         |
| Hexadecene        | kmol/h      | 0           | 0           | 0           | 0           | 0           | 0           | 0           | 0           | 0           | 0        | 0        | 0           | 0           | 0           | 0           | 0           | 0           | 0         | 0         | 0         |
| n-Octadecane      | kmol/h      | 0           | 0           | 0           | 0           | 0           | 0           | 0           | 0           | 0           | 0        | 0        | 0           | 0           | 0           | 0           | 0           | 0           | 0         | 0         | 0         |
| i-Octadecane      | kmol/h      | 0           | 0           | 0           | 0           | 0           | 0           | 0           | 0           | 0           | 0        | 0        | 0           | 0           | 0           | 0           | 0           | 0           | 0         | 0         | 0         |
| Octadecene        | kmol/h      | 0           | 0           | 0           | 0           | 0           | 0           | 0           | 0           | 0           | 0        | 0        | 0           | 0           | 0           | 0           | 0           | 0           | 0         | 0         | 0         |
| n-Eicosane        | kmol/h      | 0           | 0           | 0           | 0           | 0           | 0           | 0           | 0           | 0           | 0        | 0        | 0           | 0           | 0           | 0           | 0           | 0           | 0         | 0         | 0         |
| i-Eicosane        | kmol/h      | 0           | 0           | 0           | 0           | 0           | 0           | 0           | 0           | 0           | 0        | 0        | 0           | 0           | 0           | 0           | 0           | 0           | 0         | 0         | 0         |
| Eicosene          | kmol/h      | 0           | 0           | 0           | 0           | 0           | 0           | 0           | 0           | 0           | 0        | 0        | 0           | 0           | 0           | 0           | 0           | 0           | 0         | 0         | 0         |
| Hydrogen          | kmol/h      | 0           | 0           | 0           | 0           | 0           | 0           | 0           | 0           | 0           | 0        | 0        | 0           | 0           | 0           | 0           | 0           | 0           | 0         | 0         | 0         |
| <b>Mass Flows</b> | <b>kg/h</b> | <b>3000</b> | <b>1679</b> | <b>0</b> | <b>0</b> | <b>1321</b> | <b>1321</b> | <b>1321</b> | <b>1321</b> | <b>1321</b> | <b>1223</b> | <b>28</b> | <b>28</b> | <b>28</b> |
| Methanol          | kg/h        | 3000        | 3000        | 3000        | 3000        | 0           | 0           | 0           | 0           | 0           | 0        | 0        | 0           | 0           | 0           | 0           | 0           | 0           | 0         | 0         | 0         |
| DME               | kg/h        | 0           | 0           | 0           | 0           | 0           | 0           | 0           | 0           | 0           | 0        | 0        | 0           | 0           | 0           | 0           | 0           | 0           | 0         | 0         | 0         |
| Water             | kg/h        | 0           | 0           | 0           | 0           | 1687        | 1687        | 1687        | 1687        | 1679        | 0        | 0        | 8           | 8           | 8           | 8           | 8           | 8           | 0         | 0         | 0         |
| Methane           | kg/h        | 0           | 0           | 0           | 0           | 21          | 21          | 21          | 21          | 0           | 0        | 0        | 21          | 21          | 21          | 21          | 21          | 1           | 0         | 0         | 0         |
| Ethane            | kg/h        | 0           | 0           | 0           | 0           | 7           | 7           | 7           | 7           | 0           | 0        | 0        | 7           | 7           | 7           | 7           | 7           | 4           | 0         | 0         | 0         |
| Ethylene          | kg/h        | 0           | 0           | 0           | 0           | 18          | 18          | 18          | 18          | 0           | 0        | 0        | 18          | 18          | 18          | 18          | 18          | 7           | 0         | 0         | 0         |
| Propane           | kg/h        | 0           | 0           | 0           | 0           | 35          | 35          | 35          | 35          | 0           | 0        | 0        | 35          | 35          | 35          | 35          | 35          | 31          | 0         | 0         | 0         |
| Propylene         | kg/h        | 0           | 0           | 0           | 0           | 414         | 414         | 414         | 414         | 0           | 0        | 0        | 414         | 414         | 414         | 414         | 414         | 362         | 0         | 0         | 0         |
| n-Butane          | kg/h        | 0           | 0           | 0           | 0           | 24          | 24          | 24          | 24          | 0           | 0        | 0        | 24          | 24          | 24          | 24          | 24          | 24          | 0         | 0         | 0         |
| i-Butane          | kg/h        | 0           | 0           | 0           | 0           | 24          | 24          | 24          | 24          | 0           | 0        | 0        | 24          | 24          | 24          | 24          | 24          | 24          | 0         | 0         | 0         |

|              |                   |   |   |      |      |      |     |     |     |   |   |   |     |     |     |     |     |     |    |    |    |
|--------------|-------------------|---|---|------|------|------|-----|-----|-----|---|---|---|-----|-----|-----|-----|-----|-----|----|----|----|
| Butene       | kg/h              | 0 | 0 | 0    | 0    | 265  | 265 | 265 | 265 | 0 | 0 | 0 | 265 | 265 | 265 | 265 | 265 | 260 | 0  | 0  | 0  |
| n-Pentane    | kg/h              | 0 | 0 | 0    | 0    | 0    | 0   | 0   | 0   | 0 | 0 | 0 | 0   | 0   | 0   | 0   | 0   | 0   | 0  | 0  | 0  |
| i-Pentane    | kg/h              | 0 | 0 | 0    | 0    | 0    | 0   | 0   | 0   | 0 | 0 | 0 | 0   | 0   | 0   | 0   | 0   | 0   | 0  | 0  | 0  |
| Cyclopentane | kg/h              | 0 | 0 | 0    | 0    | 44   | 44  | 44  | 44  | 0 | 0 | 0 | 44  | 44  | 44  | 44  | 44  | 44  | 0  | 0  | 0  |
| Pentene      | kg/h              | 0 | 0 | 0    | 0    | 44   | 44  | 44  | 44  | 0 | 0 | 0 | 44  | 44  | 44  | 44  | 44  | 44  | 0  | 0  | 0  |
| n-Hexane     | kg/h              | 0 | 0 | 0    | 0    | 0    | 0   | 0   | 0   | 0 | 0 | 0 | 0   | 0   | 0   | 0   | 0   | 0   | 0  | 0  | 0  |
| i-Hexane     | kg/h              | 0 | 0 | 0    | 0    | 0    | 0   | 0   | 0   | 0 | 0 | 0 | 0   | 0   | 0   | 0   | 0   | 0   | 0  | 0  | 0  |
| Cyclohexane  | kg/h              | 0 | 0 | 0    | 0    | 116  | 116 | 116 | 116 | 0 | 0 | 0 | 116 | 116 | 116 | 116 | 116 | 116 | 1  | 1  | 1  |
| Hexene       | kg/h              | 0 | 0 | 0    | 0    | 205  | 205 | 205 | 205 | 0 | 0 | 0 | 205 | 205 | 205 | 205 | 205 | 205 | 0  | 0  | 0  |
| n-Octane     | kg/h              | 0 | 0 | 0    | 0    | 0    | 0   | 0   | 0   | 0 | 0 | 0 | 0   | 0   | 0   | 0   | 0   | 0   | 0  | 0  | 0  |
| i-Octane     | kg/h              | 0 | 0 | 0    | 0    | 0    | 0   | 0   | 0   | 0 | 0 | 0 | 0   | 0   | 0   | 0   | 0   | 0   | 0  | 0  | 0  |
| Octene       | kg/h              | 0 | 0 | 0    | 0    | 0    | 0   | 0   | 0   | 0 | 0 | 0 | 0   | 0   | 0   | 0   | 0   | 0   | 0  | 0  | 0  |
| Benzene      | kg/h              | 0 | 0 | 0    | 0    | 64   | 64  | 64  | 64  | 0 | 0 | 0 | 64  | 64  | 64  | 64  | 64  | 64  | 0  | 0  | 0  |
| Durene       | kg/h              | 0 | 0 | 0    | 0    | 31   | 31  | 31  | 31  | 0 | 0 | 0 | 31  | 31  | 31  | 31  | 31  | 31  | 26 | 26 | 26 |
| Prehnitene   | kg/h              | 0 | 0 | 0    | 0    | 0    | 0   | 0   | 0   | 0 | 0 | 0 | 0   | 0   | 0   | 0   | 0   | 0   | 0  | 0  | 0  |
| Isodurene    | kg/h              | 0 | 0 | 0    | 0    | 0    | 0   | 0   | 0   | 0 | 0 | 0 | 0   | 0   | 0   | 0   | 0   | 0   | 0  | 0  | 0  |
| n-Dodecane   | kg/h              | 0 | 0 | 0    | 0    | 0    | 0   | 0   | 0   | 0 | 0 | 0 | 0   | 0   | 0   | 0   | 0   | 0   | 0  | 0  | 0  |
| i-Dodecane   | kg/h              | 0 | 0 | 0    | 0    | 0    | 0   | 0   | 0   | 0 | 0 | 0 | 0   | 0   | 0   | 0   | 0   | 0   | 0  | 0  | 0  |
| Dodecene     | kg/h              | 0 | 0 | 0    | 0    | 0    | 0   | 0   | 0   | 0 | 0 | 0 | 0   | 0   | 0   | 0   | 0   | 0   | 0  | 0  | 0  |
| n-Hexadecane | kg/h              | 0 | 0 | 0    | 0    | 0    | 0   | 0   | 0   | 0 | 0 | 0 | 0   | 0   | 0   | 0   | 0   | 0   | 0  | 0  | 0  |
| i-Hexadecane | kg/h              | 0 | 0 | 0    | 0    | 0    | 0   | 0   | 0   | 0 | 0 | 0 | 0   | 0   | 0   | 0   | 0   | 0   | 0  | 0  | 0  |
| Hexadecene   | kg/h              | 0 | 0 | 0    | 0    | 0    | 0   | 0   | 0   | 0 | 0 | 0 | 0   | 0   | 0   | 0   | 0   | 0   | 0  | 0  | 0  |
| n-Octadecane | kg/h              | 0 | 0 | 0    | 0    | 0    | 0   | 0   | 0   | 0 | 0 | 0 | 0   | 0   | 0   | 0   | 0   | 0   | 0  | 0  | 0  |
| i-Octadecane | kg/h              | 0 | 0 | 0    | 0    | 0    | 0   | 0   | 0   | 0 | 0 | 0 | 0   | 0   | 0   | 0   | 0   | 0   | 0  | 0  | 0  |
| Octadecene   | kg/h              | 0 | 0 | 0    | 0    | 0    | 0   | 0   | 0   | 0 | 0 | 0 | 0   | 0   | 0   | 0   | 0   | 0   | 0  | 0  | 0  |
| n-Eicosane   | kg/h              | 0 | 0 | 0    | 0    | 0    | 0   | 0   | 0   | 0 | 0 | 0 | 0   | 0   | 0   | 0   | 0   | 0   | 0  | 0  | 0  |
| i-Eicosane   | kg/h              | 0 | 0 | 0    | 0    | 0    | 0   | 0   | 0   | 0 | 0 | 0 | 0   | 0   | 0   | 0   | 0   | 0   | 0  | 0  | 0  |
| Eicosene     | kg/h              | 0 | 0 | 0    | 0    | 0    | 0   | 0   | 0   | 0 | 0 | 0 | 0   | 0   | 0   | 0   | 0   | 0   | 0  | 0  | 0  |
| Hydrogen     | kg/h              | 0 | 0 | 0    | 0    | 0    | 0   | 0   | 0   | 0 | 0 | 0 | 0   | 0   | 0   | 0   | 0   | 0   | 0  | 0  | 0  |
| Volume Flow  | m <sup>3</sup> /h | 4 | 4 | 2730 | 2809 | 3543 | 484 | 463 | 302 | 2 | 0 | 0 | 301 | 44  | 45  | 35  | 8   | 2   | 0  | 0  | 0  |

Table S8. (cont.).

| Stream                |               | 21       | 22       | 23       | 24       | 25       | 26       | 27       | 28       | 29       | 30       | 31       | 32       | 33       | 34       | 35       | 36        | 37        | 38        | 39        | 40       |
|-----------------------|---------------|----------|----------|----------|----------|----------|----------|----------|----------|----------|----------|----------|----------|----------|----------|----------|-----------|-----------|-----------|-----------|----------|
| Temperature           | C             | 345      | 345      | 320      | 135      | 30       | 10       | 10       | 80       | 41       | 30       | 10       | 10       | 21       | 85       | 345      | 44        | 51        | 98        | 200       | 200      |
| Pressure              | bar           | 17       | 16       | 16       | 16       | 16       | 16       | 14       | 5        | 1        | 1        | 14       | 14       | 16       | 16       | 17       | 10        | 40        | 40        | 40        | 39       |
| Molar Vapor Fraction  |               | 1        | 1        | 1        | 1        | 1        | 1        | 0        | 0        | 0        | 0        | 1        | 1        | 1        | 1        | 1        | 0         | 0         | 0         | 1         | 0        |
| Molar Liquid Fraction |               | 0        | 0        | 0        | 0        | 0        | 0        | 1        | 1        | 1        | 1        | 0        | 0        | 0        | 0        | 0        | 1         | 1         | 1         | 0         | 1        |
| <b>Mole Flows</b>     | <b>kmol/h</b> | <b>0</b> | <b>1</b> | <b>1</b> | <b>1</b> | <b>1</b> | <b>1</b> | <b>0</b> | <b>3</b> | <b>3</b> | <b>3</b> | <b>0</b> | <b>0</b> | <b>0</b> | <b>0</b> | <b>0</b> | <b>21</b> | <b>21</b> | <b>21</b> | <b>21</b> | <b>9</b> |
| Methanol              | kmol/h        | 0        | 0        | 0        | 0        | 0        | 0        | 0        | 0        | 0        | 0        | 0        | 0        | 0        | 0        | 0        | 0         | 0         | 0         | 0         | 0        |
| DME                   | kmol/h        | 0        | 0        | 0        | 0        | 0        | 0        | 0        | 0        | 0        | 0        | 0        | 0        | 0        | 0        | 0        | 0         | 0         | 0         | 0         | 0        |
| Water                 | kmol/h        | 0        | 0        | 0        | 0        | 0        | 0        | 0        | 0        | 0        | 0        | 0        | 0        | 0        | 0        | 0        | 0         | 0         | 0         | 0         | 0        |
| Methane               | kmol/h        | 0        | 0        | 0        | 0        | 0        | 0        | 0        | 0        | 0        | 0        | 0        | 0        | 0        | 0        | 0        | 0         | 0         | 0         | 0         | 0        |
| Ethane                | kmol/h        | 0        | 0        | 0        | 0        | 0        | 0        | 0        | 0        | 0        | 0        | 0        | 0        | 0        | 0        | 0        | 0         | 0         | 0         | 0         | 0        |
| Ethylene              | kmol/h        | 0        | 0        | 0        | 0        | 0        | 0        | 0        | 0        | 0        | 0        | 0        | 0        | 0        | 0        | 0        | 0         | 0         | 0         | 0         | 0        |
| Propane               | kmol/h        | 0        | 0        | 0        | 0        | 0        | 0        | 0        | 0        | 0        | 0        | 0        | 0        | 0        | 0        | 0        | 1         | 1         | 1         | 1         | 1        |
| Propylene             | kmol/h        | 0        | 0        | 0        | 0        | 0        | 0        | 0        | 0        | 0        | 0        | 0        | 0        | 0        | 0        | 0        | 9         | 9         | 9         | 9         | 0        |
| n-Butane              | kmol/h        | 0        | 0        | 0        | 0        | 0        | 0        | 0        | 0        | 0        | 0        | 0        | 0        | 0        | 0        | 0        | 0         | 0         | 0         | 0         | 0        |
| i-Butane              | kmol/h        | 0        | 0        | 0        | 0        | 0        | 0        | 0        | 0        | 0        | 0        | 0        | 0        | 0        | 0        | 0        | 0         | 0         | 0         | 0         | 0        |
| Butene                | kmol/h        | 0        | 0        | 0        | 0        | 0        | 0        | 0        | 0        | 0        | 0        | 0        | 0        | 0        | 0        | 0        | 5         | 5         | 5         | 5         | 0        |
| n-Pentane             | kmol/h        | 0        | 0        | 0        | 0        | 0        | 0        | 0        | 0        | 0        | 0        | 0        | 0        | 0        | 0        | 0        | 0         | 0         | 0         | 0         | 0        |
| i-Pentane             | kmol/h        | 0        | 0        | 0        | 0        | 0        | 0        | 0        | 0        | 0        | 0        | 0        | 0        | 0        | 0        | 0        | 0         | 0         | 0         | 0         | 0        |
| Cyclopentane          | kmol/h        | 0        | 0        | 0        | 0        | 0        | 0        | 0        | 0        | 0        | 0        | 0        | 0        | 0        | 0        | 0        | 1         | 1         | 1         | 1         | 1        |
| Pentene               | kmol/h        | 0        | 0        | 0        | 0        | 0        | 0        | 0        | 1        | 1        | 1        | 0        | 0        | 0        | 0        | 0        | 1         | 1         | 1         | 1         | 1        |
| n-Hexane              | kmol/h        | 0        | 0        | 0        | 0        | 0        | 0        | 0        | 0        | 0        | 0        | 0        | 0        | 0        | 0        | 0        | 0         | 0         | 0         | 0         | 0        |
| i-Hexane              | kmol/h        | 0        | 0        | 0        | 0        | 0        | 0        | 0        | 0        | 0        | 0        | 0        | 0        | 0        | 0        | 0        | 0         | 0         | 0         | 0         | 0        |
| Cyclohexane           | kmol/h        | 0        | 0        | 0        | 0        | 0        | 0        | 0        | 1        | 1        | 1        | 0        | 0        | 0        | 0        | 0        | 1         | 1         | 1         | 1         | 1        |
| Hexene                | kmol/h        | 0        | 0        | 0        | 0        | 0        | 0        | 0        | 0        | 0        | 0        | 0        | 0        | 0        | 0        | 0        | 2         | 2         | 2         | 2         | 0        |
| n-Octane              | kmol/h        | 0        | 0        | 0        | 0        | 0        | 0        | 0        | 0        | 0        | 0        | 0        | 0        | 0        | 0        | 0        | 0         | 0         | 0         | 0         | 0        |
| i-Octane              | kmol/h        | 0        | 0        | 0        | 0        | 0        | 0        | 0        | 0        | 0        | 0        | 0        | 0        | 0        | 0        | 0        | 0         | 0         | 0         | 0         | 0        |
| Octene                | kmol/h        | 0        | 0        | 0        | 0        | 0        | 0        | 0        | 0        | 0        | 0        | 0        | 0        | 0        | 0        | 0        | 0         | 0         | 0         | 0         | 0        |



|                   |             |           |           |           |           |           |           |           |            |            |            |          |          |          |          |          |             |             |             |             |             |
|-------------------|-------------|-----------|-----------|-----------|-----------|-----------|-----------|-----------|------------|------------|------------|----------|----------|----------|----------|----------|-------------|-------------|-------------|-------------|-------------|
| Benzene           | kmol/h      | 0         | 0         | 0         | 0         | 0         | 0         | 0         | 0          | 0          | 0          | 0        | 0        | 0        | 0        | 0        | 1           | 1           | 1           | 1           | 1           |
| Durene            | kmol/h      | 0         | 0         | 0         | 0         | 0         | 0         | 0         | 0          | 0          | 0          | 0        | 0        | 0        | 0        | 0        | 0           | 0           | 0           | 0           | 0           |
| Prehnitene        | kmol/h      | 0         | 0         | 0         | 0         | 0         | 0         | 0         | 0          | 0          | 0          | 0        | 0        | 0        | 0        | 0        | 0           | 0           | 0           | 0           | 0           |
| Isodurene         | kmol/h      | 0         | 0         | 0         | 0         | 0         | 0         | 0         | 0          | 0          | 0          | 0        | 0        | 0        | 0        | 0        | 0           | 0           | 0           | 0           | 0           |
| n-Dodecane        | kmol/h      | 0         | 0         | 0         | 0         | 0         | 0         | 0         | 0          | 0          | 0          | 0        | 0        | 0        | 0        | 0        | 0           | 0           | 0           | 0           | 0           |
| i-Dodecane        | kmol/h      | 0         | 0         | 0         | 0         | 0         | 0         | 0         | 0          | 0          | 0          | 0        | 0        | 0        | 0        | 0        | 0           | 0           | 0           | 0           | 0           |
| Dodecene          | kmol/h      | 0         | 0         | 0         | 0         | 0         | 0         | 0         | 0          | 0          | 0          | 0        | 0        | 0        | 0        | 0        | 0           | 0           | 0           | 0           | 1           |
| n-Hexadecane      | kmol/h      | 0         | 0         | 0         | 0         | 0         | 0         | 0         | 0          | 0          | 0          | 0        | 0        | 0        | 0        | 0        | 0           | 0           | 0           | 0           | 0           |
| i-Hexadecane      | kmol/h      | 0         | 0         | 0         | 0         | 0         | 0         | 0         | 0          | 0          | 0          | 0        | 0        | 0        | 0        | 0        | 0           | 0           | 0           | 0           | 0           |
| Hexadecene        | kmol/h      | 0         | 0         | 0         | 0         | 0         | 0         | 0         | 0          | 0          | 0          | 0        | 0        | 0        | 0        | 0        | 0           | 0           | 0           | 0           | 1           |
| n-Octadecane      | kmol/h      | 0         | 0         | 0         | 0         | 0         | 0         | 0         | 0          | 0          | 0          | 0        | 0        | 0        | 0        | 0        | 0           | 0           | 0           | 0           | 0           |
| i-Octadecane      | kmol/h      | 0         | 0         | 0         | 0         | 0         | 0         | 0         | 0          | 0          | 0          | 0        | 0        | 0        | 0        | 0        | 0           | 0           | 0           | 0           | 0           |
| Octadecene        | kmol/h      | 0         | 0         | 0         | 0         | 0         | 0         | 0         | 0          | 0          | 0          | 0        | 0        | 0        | 0        | 0        | 0           | 0           | 0           | 0           | 1           |
| n-Eicosane        | kmol/h      | 0         | 0         | 0         | 0         | 0         | 0         | 0         | 0          | 0          | 0          | 0        | 0        | 0        | 0        | 0        | 0           | 0           | 0           | 0           | 0           |
| i-Eicosane        | kmol/h      | 0         | 0         | 0         | 0         | 0         | 0         | 0         | 0          | 0          | 0          | 0        | 0        | 0        | 0        | 0        | 0           | 0           | 0           | 0           | 0           |
| Eicosene          | kmol/h      | 0         | 0         | 0         | 0         | 0         | 0         | 0         | 0          | 0          | 0          | 0        | 0        | 0        | 0        | 0        | 0           | 0           | 0           | 0           | 0           |
| Hydrogen          | kmol/h      | 0         | 0         | 0         | 0         | 0         | 0         | 0         | 0          | 0          | 0          | 0        | 0        | 0        | 0        | 0        | 0           | 0           | 0           | 0           | 0           |
| <b>Mass Flows</b> | <b>kg/h</b> | <b>28</b> | <b>29</b> | <b>29</b> | <b>29</b> | <b>29</b> | <b>29</b> | <b>28</b> | <b>224</b> | <b>224</b> | <b>224</b> | <b>1</b> | <b>1</b> | <b>1</b> | <b>1</b> | <b>1</b> | <b>1195</b> | <b>1195</b> | <b>1195</b> | <b>1195</b> | <b>1195</b> |
| Methanol          | kg/h        | 0         | 0         | 0         | 0         | 0         | 0         | 0         | 0          | 0          | 0          | 0        | 0        | 0        | 0        | 0        | 0           | 0           | 0           | 0           | 0           |
| DME               | kg/h        | 0         | 0         | 0         | 0         | 0         | 0         | 0         | 0          | 0          | 0          | 0        | 0        | 0        | 0        | 0        | 0           | 0           | 0           | 0           | 0           |
| Water             | kg/h        | 0         | 0         | 0         | 0         | 0         | 0         | 0         | 7          | 7          | 7          | 0        | 0        | 0        | 0        | 0        | 8           | 8           | 8           | 8           | 8           |
| Methane           | kg/h        | 0         | 0         | 0         | 0         | 0         | 0         | 0         | 0          | 0          | 0          | 0        | 0        | 0        | 0        | 0        | 1           | 1           | 1           | 1           | 1           |
| Ethane            | kg/h        | 0         | 0         | 0         | 0         | 0         | 0         | 0         | 0          | 0          | 0          | 0        | 0        | 0        | 0        | 0        | 4           | 4           | 4           | 4           | 4           |
| Ethylene          | kg/h        | 0         | 0         | 0         | 0         | 0         | 0         | 0         | 0          | 0          | 0          | 0        | 0        | 0        | 0        | 0        | 7           | 7           | 7           | 7           | 0           |
| Propane           | kg/h        | 0         | 0         | 0         | 0         | 0         | 0         | 0         | 2          | 2          | 2          | 0        | 0        | 0        | 0        | 0        | 31          | 31          | 31          | 31          | 31          |
| Propylene         | kg/h        | 0         | 0         | 0         | 0         | 0         | 0         | 0         | 0          | 0          | 0          | 0        | 0        | 0        | 0        | 0        | 362         | 362         | 362         | 362         | 0           |
| n-Butane          | kg/h        | 0         | 0         | 0         | 0         | 0         | 0         | 0         | 14         | 14         | 14         | 0        | 0        | 0        | 0        | 0        | 24          | 24          | 24          | 24          | 24          |
| i-Butane          | kg/h        | 0         | 0         | 0         | 0         | 0         | 0         | 0         | 7          | 7          | 7          | 0        | 0        | 0        | 0        | 0        | 24          | 24          | 24          | 24          | 24          |
| Butene            | kg/h        | 0         | 0         | 0         | 0         | 0         | 0         | 0         | 0          | 0          | 0          | 0        | 0        | 0        | 0        | 0        | 260         | 260         | 260         | 260         | 0           |
| n-Pentane         | kg/h        | 0         | 2         | 2         | 2         | 2         | 2         | 2         | 2          | 2          | 2          | 0        | 0        | 0        | 0        | 0        | 0           | 0           | 0           | 0           | 0           |
| i-Pentane         | kg/h        | 0         | 0         | 0         | 0         | 0         | 0         | 0         | 0          | 0          | 0          | 0        | 0        | 0        | 0        | 0        | 0           | 0           | 0           | 0           | 0           |

|              |                   |    |    |    |    |    |    |    |    |    |    |   |   |   |   |   |     |     |     |     |     |
|--------------|-------------------|----|----|----|----|----|----|----|----|----|----|---|---|---|---|---|-----|-----|-----|-----|-----|
| Cyclopentane | kg/h              | 0  | 0  | 0  | 0  | 0  | 0  | 0  | 33 | 33 | 33 | 0 | 0 | 0 | 0 | 0 | 44  | 44  | 44  | 44  | 44  |
| Pentene      | kg/h              | 0  | 0  | 0  | 0  | 0  | 0  | 0  | 38 | 38 | 38 | 0 | 0 | 0 | 0 | 0 | 44  | 44  | 44  | 44  | 44  |
| n-Hexane     | kg/h              | 0  | 0  | 0  | 0  | 0  | 0  | 0  | 0  | 0  | 0  | 0 | 0 | 0 | 0 | 0 | 0   | 0   | 0   | 0   | 0   |
| i-Hexane     | kg/h              | 0  | 0  | 0  | 0  | 0  | 0  | 0  | 0  | 0  | 0  | 0 | 0 | 0 | 0 | 0 | 0   | 0   | 0   | 0   | 0   |
| Cyclohexane  | kg/h              | 1  | 1  | 1  | 1  | 1  | 1  | 1  | 59 | 59 | 59 | 0 | 0 | 0 | 0 | 0 | 115 | 115 | 115 | 115 | 115 |
| Hexene       | kg/h              | 0  | 0  | 0  | 0  | 0  | 0  | 0  | 1  | 1  | 1  | 0 | 0 | 0 | 0 | 0 | 204 | 204 | 204 | 204 | 1   |
| n-Octane     | kg/h              | 0  | 0  | 0  | 0  | 0  | 0  | 0  | 0  | 0  | 0  | 0 | 0 | 0 | 0 | 0 | 0   | 0   | 0   | 0   | 0   |
| i-Octane     | kg/h              | 0  | 0  | 0  | 0  | 0  | 0  | 0  | 0  | 0  | 0  | 0 | 0 | 0 | 0 | 0 | 0   | 0   | 0   | 0   | 0   |
| Octene       | kg/h              | 0  | 0  | 0  | 0  | 0  | 0  | 0  | 0  | 0  | 0  | 0 | 0 | 0 | 0 | 0 | 0   | 0   | 0   | 0   | 1   |
| Benzene      | kg/h              | 0  | 0  | 0  | 0  | 0  | 0  | 0  | 36 | 36 | 36 | 0 | 0 | 0 | 0 | 0 | 64  | 64  | 64  | 64  | 64  |
| Durene       | kg/h              | 26 | 11 | 11 | 11 | 11 | 11 | 11 | 11 | 11 | 11 | 0 | 0 | 0 | 0 | 0 | 5   | 5   | 5   | 5   | 5   |
| Prehnitene   | kg/h              | 0  | 6  | 6  | 6  | 6  | 6  | 6  | 6  | 6  | 6  | 0 | 0 | 0 | 0 | 0 | 0   | 0   | 0   | 0   | 0   |
| Isodurene    | kg/h              | 0  | 6  | 6  | 6  | 6  | 6  | 6  | 6  | 6  | 6  | 0 | 0 | 0 | 0 | 0 | 0   | 0   | 0   | 0   | 0   |
| n-Dodecane   | kg/h              | 0  | 0  | 0  | 0  | 0  | 0  | 0  | 0  | 0  | 0  | 0 | 0 | 0 | 0 | 0 | 0   | 0   | 0   | 0   | 0   |
| i-Dodecane   | kg/h              | 0  | 0  | 0  | 0  | 0  | 0  | 0  | 0  | 0  | 0  | 0 | 0 | 0 | 0 | 0 | 0   | 0   | 0   | 0   | 0   |
| Dodecene     | kg/h              | 0  | 0  | 0  | 0  | 0  | 0  | 0  | 1  | 1  | 1  | 0 | 0 | 0 | 0 | 0 | 0   | 0   | 0   | 0   | 234 |
| n-Hexadecane | kg/h              | 0  | 0  | 0  | 0  | 0  | 0  | 0  | 0  | 0  | 0  | 0 | 0 | 0 | 0 | 0 | 0   | 0   | 0   | 0   | 0   |
| i-Hexadecane | kg/h              | 0  | 0  | 0  | 0  | 0  | 0  | 0  | 0  | 0  | 0  | 0 | 0 | 0 | 0 | 0 | 0   | 0   | 0   | 0   | 0   |
| Hexadecene   | kg/h              | 0  | 0  | 0  | 0  | 0  | 0  | 0  | 0  | 0  | 0  | 0 | 0 | 0 | 0 | 0 | 0   | 0   | 0   | 0   | 213 |
| n-Octadecane | kg/h              | 0  | 0  | 0  | 0  | 0  | 0  | 0  | 0  | 0  | 0  | 0 | 0 | 0 | 0 | 0 | 0   | 0   | 0   | 0   | 0   |
| i-Octadecane | kg/h              | 0  | 0  | 0  | 0  | 0  | 0  | 0  | 0  | 0  | 0  | 0 | 0 | 0 | 0 | 0 | 0   | 0   | 0   | 0   | 0   |
| Octadecene   | kg/h              | 0  | 0  | 0  | 0  | 0  | 0  | 0  | 0  | 0  | 0  | 0 | 0 | 0 | 0 | 0 | 0   | 0   | 0   | 0   | 252 |
| n-Eicosane   | kg/h              | 0  | 0  | 0  | 0  | 0  | 0  | 0  | 0  | 0  | 0  | 0 | 0 | 0 | 0 | 0 | 0   | 0   | 0   | 0   | 0   |
| i-Eicosane   | kg/h              | 0  | 0  | 0  | 0  | 0  | 0  | 0  | 0  | 0  | 0  | 0 | 0 | 0 | 0 | 0 | 0   | 0   | 0   | 0   | 0   |
| Eicosene     | kg/h              | 0  | 0  | 0  | 0  | 0  | 0  | 0  | 0  | 0  | 0  | 0 | 0 | 0 | 0 | 0 | 0   | 0   | 0   | 0   | 132 |
| Hydrogen     | kg/h              | 0  | 1  | 1  | 1  | 1  | 1  | 0  | 0  | 0  | 0  | 1 | 1 | 1 | 1 | 1 | 0   | 0   | 0   | 0   | 0   |
| Volume Flow  | m <sup>3</sup> /h | 0  | 2  | 2  | 1  | 1  | 1  | 0  | 0  | 19 | 2  | 1 | 1 | 0 | 1 | 1 | 2   | 2   | 2   | 15  | 2   |

Table S8. (cont.).

| Stream                |               | 41       | 42       | 43       | 44       | 45       | 46       | 47       | 48       | 49       | 50       | 51       | 52       | 53       | 54       | 55       | 56       | 57       | 58       | 59       | 60       |
|-----------------------|---------------|----------|----------|----------|----------|----------|----------|----------|----------|----------|----------|----------|----------|----------|----------|----------|----------|----------|----------|----------|----------|
| Temperature           | C             | 177      | 216      | 222      | 300      | 300      | 135      | 30       | 30       | 32       | 32       | 299      | 135      | 30       | 196      | 30       | 32       | 30       | 42       | 112      | 300      |
| Pressure              | bar           | 5        | 5        | 40       | 40       | 40       | 40       | 40       | 36       | 1        | 1        | 1        | 1        | 1        | 1        | 1        | 1        | 36       | 40       | 40       | 40       |
| Molar Vapor Fraction  |               | 0        | 0        | 0        | 0        | 0        | 0        | 0        | 0        | 0        | 0        | 0        | 0        | 0        | 1        | 0        | 1        | 1        | 1        | 1        | 1        |
| Molar Liquid Fraction |               | 1        | 1        | 1        | 1        | 1        | 1        | 1        | 1        | 1        | 1        | 1        | 1        | 1        | 0        | 1        | 0        | 0        | 0        | 0        | 0        |
| <b>Mole Flows</b>     | <b>kmol/h</b> | <b>9</b> | <b>5</b> | <b>5</b> | <b>5</b> | <b>7</b> | <b>7</b> | <b>7</b> | <b>5</b> | <b>5</b> | <b>5</b> | <b>2</b> | <b>2</b> | <b>2</b> | <b>3</b> | <b>3</b> | <b>0</b> | <b>2</b> | <b>2</b> | <b>5</b> | <b>5</b> |
| Methanol              | kmol/h        | 0        | 0        | 0        | 0        | 0        | 0        | 0        | 0        | 0        | 0        | 0        | 0        | 0        | 0        | 0        | 0        | 0        | 0        | 0        | 0        |
| DME                   | kmol/h        | 0        | 0        | 0        | 0        | 0        | 0        | 0        | 0        | 0        | 0        | 0        | 0        | 0        | 0        | 0        | 0        | 0        | 0        | 0        | 0        |
| Water                 | kmol/h        | 0        | 0        | 0        | 0        | 0        | 0        | 0        | 0        | 0        | 0        | 0        | 0        | 0        | 0        | 0        | 0        | 0        | 0        | 0        | 0        |
| Methane               | kmol/h        | 0        | 0        | 0        | 0        | 0        | 0        | 0        | 0        | 0        | 0        | 0        | 0        | 0        | 0        | 0        | 0        | 0        | 0        | 0        | 0        |
| Ethane                | kmol/h        | 0        | 0        | 0        | 0        | 0        | 0        | 0        | 0        | 0        | 0        | 0        | 0        | 0        | 0        | 0        | 0        | 0        | 0        | 0        | 0        |
| Ethylene              | kmol/h        | 0        | 0        | 0        | 0        | 0        | 0        | 0        | 0        | 0        | 0        | 0        | 0        | 0        | 0        | 0        | 0        | 0        | 0        | 0        | 0        |
| Propane               | kmol/h        | 1        | 0        | 0        | 0        | 0        | 0        | 0        | 0        | 0        | 0        | 0        | 0        | 0        | 0        | 0        | 0        | 0        | 0        | 0        | 0        |
| Propylene             | kmol/h        | 0        | 0        | 0        | 0        | 0        | 0        | 0        | 0        | 0        | 0        | 0        | 0        | 0        | 0        | 0        | 0        | 0        | 0        | 0        | 0        |
| n-Butane              | kmol/h        | 0        | 0        | 0        | 0        | 0        | 0        | 0        | 0        | 0        | 0        | 0        | 0        | 0        | 0        | 0        | 0        | 0        | 0        | 0        | 0        |
| i-Butane              | kmol/h        | 0        | 0        | 0        | 0        | 0        | 0        | 0        | 0        | 0        | 0        | 0        | 0        | 0        | 0        | 0        | 0        | 0        | 0        | 0        | 0        |
| Butene                | kmol/h        | 0        | 0        | 0        | 0        | 0        | 0        | 0        | 0        | 0        | 0        | 0        | 0        | 0        | 0        | 0        | 0        | 0        | 0        | 0        | 0        |
| n-Pentane             | kmol/h        | 0        | 0        | 0        | 0        | 0        | 0        | 0        | 0        | 0        | 0        | 0        | 0        | 0        | 0        | 0        | 0        | 0        | 0        | 0        | 0        |
| i-Pentane             | kmol/h        | 0        | 0        | 0        | 0        | 0        | 0        | 0        | 0        | 0        | 0        | 0        | 0        | 0        | 0        | 0        | 0        | 0        | 0        | 0        | 0        |
| Cyclopentane          | kmol/h        | 1        | 0        | 0        | 0        | 0        | 0        | 0        | 0        | 0        | 0        | 0        | 0        | 0        | 0        | 0        | 0        | 0        | 0        | 0        | 0        |
| Pentene               | kmol/h        | 1        | 0        | 0        | 0        | 0        | 0        | 0        | 0        | 0        | 0        | 0        | 0        | 0        | 0        | 0        | 0        | 0        | 0        | 0        | 0        |
| n-Hexane              | kmol/h        | 0        | 0        | 0        | 0        | 0        | 0        | 0        | 0        | 0        | 0        | 0        | 0        | 0        | 0        | 0        | 0        | 0        | 0        | 0        | 0        |
| i-Hexane              | kmol/h        | 0        | 0        | 0        | 0        | 0        | 0        | 0        | 0        | 0        | 0        | 0        | 0        | 0        | 0        | 0        | 0        | 0        | 0        | 0        | 0        |
| Cyclohexane           | kmol/h        | 1        | 1        | 1        | 1        | 1        | 1        | 1        | 1        | 1        | 1        | 0        | 0        | 0        | 1        | 1        | 0        | 0        | 0        | 0        | 0        |
| Hexene                | kmol/h        | 0        | 0        | 0        | 0        | 0        | 0        | 0        | 0        | 0        | 0        | 0        | 0        | 0        | 0        | 0        | 0        | 0        | 0        | 0        | 0        |
| n-Octane              | kmol/h        | 0        | 0        | 0        | 0        | 0        | 0        | 0        | 0        | 0        | 0        | 0        | 0        | 0        | 0        | 0        | 0        | 0        | 0        | 0        | 0        |
| i-Octane              | kmol/h        | 0        | 0        | 0        | 0        | 0        | 0        | 0        | 0        | 0        | 0        | 0        | 0        | 0        | 0        | 0        | 0        | 0        | 0        | 0        | 0        |
| Octene                | kmol/h        | 0        | 0        | 0        | 0        | 0        | 0        | 0        | 0        | 0        | 0        | 0        | 0        | 0        | 0        | 0        | 0        | 0        | 0        | 0        | 0        |

|                   |             |             |            |            |            |            |            |            |            |            |            |            |            |            |            |            |          |          |          |           |           |
|-------------------|-------------|-------------|------------|------------|------------|------------|------------|------------|------------|------------|------------|------------|------------|------------|------------|------------|----------|----------|----------|-----------|-----------|
| Benzene           | kmol/h      | 1           | 0          | 0          | 0          | 0          | 0          | 0          | 0          | 0          | 0          | 0          | 0          | 0          | 0          | 0          | 0        | 0        | 0        | 0         | 0         |
| Durene            | kmol/h      | 0           | 0          | 0          | 0          | 0          | 0          | 0          | 0          | 0          | 0          | 0          | 0          | 0          | 0          | 0          | 0        | 0        | 0        | 0         | 0         |
| Prehnitene        | kmol/h      | 0           | 0          | 0          | 0          | 0          | 0          | 0          | 0          | 0          | 0          | 0          | 0          | 0          | 0          | 0          | 0        | 0        | 0        | 0         | 0         |
| Isodurene         | kmol/h      | 0           | 0          | 0          | 0          | 0          | 0          | 0          | 0          | 0          | 0          | 0          | 0          | 0          | 0          | 0          | 0        | 0        | 0        | 0         | 0         |
| n-Dodecane        | kmol/h      | 0           | 0          | 0          | 0          | 1          | 1          | 1          | 1          | 1          | 1          | 0          | 0          | 0          | 1          | 1          | 0        | 0        | 0        | 0         | 0         |
| i-Dodecane        | kmol/h      | 0           | 0          | 0          | 0          | 1          | 1          | 1          | 1          | 1          | 1          | 0          | 0          | 0          | 1          | 1          | 0        | 0        | 0        | 0         | 0         |
| Dodecene          | kmol/h      | 1           | 1          | 1          | 1          | 0          | 0          | 0          | 0          | 0          | 0          | 0          | 0          | 0          | 0          | 0          | 0        | 0        | 0        | 0         | 0         |
| n-Hexadecane      | kmol/h      | 0           | 0          | 0          | 0          | 0          | 0          | 0          | 0          | 0          | 0          | 0          | 0          | 0          | 0          | 0          | 0        | 0        | 0        | 0         | 0         |
| i-Hexadecane      | kmol/h      | 0           | 0          | 0          | 0          | 0          | 0          | 0          | 0          | 0          | 0          | 0          | 0          | 0          | 0          | 0          | 0        | 0        | 0        | 0         | 0         |
| Hexadecene        | kmol/h      | 1           | 1          | 1          | 1          | 0          | 0          | 0          | 0          | 0          | 0          | 0          | 0          | 0          | 0          | 0          | 0        | 0        | 0        | 0         | 0         |
| n-Octadecane      | kmol/h      | 0           | 0          | 0          | 0          | 0          | 0          | 0          | 0          | 0          | 0          | 0          | 0          | 0          | 0          | 0          | 0        | 0        | 0        | 0         | 0         |
| i-Octadecane      | kmol/h      | 0           | 0          | 0          | 0          | 0          | 0          | 0          | 0          | 0          | 0          | 0          | 0          | 0          | 0          | 0          | 0        | 0        | 0        | 0         | 0         |
| Octadecene        | kmol/h      | 1           | 1          | 1          | 1          | 0          | 0          | 0          | 0          | 0          | 0          | 0          | 0          | 0          | 0          | 0          | 0        | 0        | 0        | 0         | 0         |
| n-Eicosane        | kmol/h      | 0           | 0          | 0          | 0          | 0          | 0          | 0          | 0          | 0          | 0          | 0          | 0          | 0          | 0          | 0          | 0        | 0        | 0        | 0         | 0         |
| i-Eicosane        | kmol/h      | 0           | 0          | 0          | 0          | 0          | 0          | 0          | 0          | 0          | 0          | 0          | 0          | 0          | 0          | 0          | 0        | 0        | 0        | 0         | 0         |
| Eicosene          | kmol/h      | 0           | 0          | 0          | 0          | 0          | 0          | 0          | 0          | 0          | 0          | 0          | 0          | 0          | 0          | 0          | 0        | 0        | 0        | 0         | 0         |
| Hydrogen          | kmol/h      | 0           | 0          | 0          | 0          | 2          | 2          | 2          | 0          | 0          | 0          | 0          | 0          | 0          | 0          | 0          | 0        | 2        | 2        | 5         | 5         |
| <b>Mass Flows</b> | <b>kg/h</b> | <b>1195</b> | <b>941</b> | <b>941</b> | <b>941</b> | <b>951</b> | <b>951</b> | <b>951</b> | <b>948</b> | <b>948</b> | <b>946</b> | <b>591</b> | <b>591</b> | <b>591</b> | <b>356</b> | <b>356</b> | <b>1</b> | <b>4</b> | <b>4</b> | <b>11</b> | <b>11</b> |
| Methanol          | kg/h        | 0           | 0          | 0          | 0          | 0          | 0          | 0          | 0          | 0          | 0          | 0          | 0          | 0          | 0          | 0          | 0        | 0        | 0        | 0         | 0         |
| DME               | kg/h        | 0           | 0          | 0          | 0          | 0          | 0          | 0          | 0          | 0          | 0          | 0          | 0          | 0          | 0          | 0          | 0        | 0        | 0        | 0         | 0         |
| Water             | kg/h        | 8           | 0          | 0          | 0          | 0          | 0          | 0          | 0          | 0          | 0          | 0          | 0          | 0          | 0          | 0          | 0        | 0        | 0        | 0         | 0         |
| Methane           | kg/h        | 1           | 0          | 0          | 0          | 0          | 0          | 0          | 0          | 0          | 0          | 0          | 0          | 0          | 0          | 0          | 0        | 0        | 0        | 0         | 0         |
| Ethane            | kg/h        | 4           | 0          | 0          | 0          | 0          | 0          | 0          | 0          | 0          | 0          | 0          | 0          | 0          | 0          | 0          | 0        | 0        | 0        | 0         | 0         |
| Ethylene          | kg/h        | 0           | 0          | 0          | 0          | 0          | 0          | 0          | 0          | 0          | 0          | 0          | 0          | 0          | 0          | 0          | 0        | 0        | 0        | 0         | 0         |
| Propane           | kg/h        | 31          | 0          | 0          | 0          | 0          | 0          | 0          | 0          | 0          | 0          | 0          | 0          | 0          | 0          | 0          | 0        | 0        | 0        | 0         | 0         |
| Propylene         | kg/h        | 0           | 0          | 0          | 0          | 0          | 0          | 0          | 0          | 0          | 0          | 0          | 0          | 0          | 0          | 0          | 0        | 0        | 0        | 0         | 0         |
| n-Butane          | kg/h        | 24          | 1          | 1          | 1          | 1          | 1          | 1          | 1          | 1          | 1          | 0          | 0          | 0          | 1          | 1          | 0        | 0        | 0        | 0         | 0         |
| i-Butane          | kg/h        | 24          | 1          | 1          | 1          | 1          | 1          | 1          | 1          | 1          | 1          | 0          | 0          | 0          | 1          | 1          | 0        | 0        | 0        | 0         | 0         |
| Butene            | kg/h        | 0           | 0          | 0          | 0          | 0          | 0          | 0          | 0          | 0          | 0          | 0          | 0          | 0          | 0          | 0          | 0        | 0        | 0        | 0         | 0         |
| n-Pentane         | kg/h        | 0           | 0          | 0          | 0          | 0          | 0          | 0          | 0          | 0          | 0          | 0          | 0          | 0          | 0          | 0          | 0        | 0        | 0        | 0         | 0         |
| i-Pentane         | kg/h        | 0           | 0          | 0          | 0          | 0          | 0          | 0          | 0          | 0          | 0          | 0          | 0          | 0          | 0          | 0          | 0        | 0        | 0        | 0         | 0         |

|              |                   |     |     |     |     |     |     |     |     |     |     |     |     |     |     |     |   |   |   |    |    |
|--------------|-------------------|-----|-----|-----|-----|-----|-----|-----|-----|-----|-----|-----|-----|-----|-----|-----|---|---|---|----|----|
| Cyclopentane | kg/h              | 44  | 11  | 11  | 11  | 11  | 11  | 11  | 11  | 11  | 10  | 0   | 0   | 0   | 10  | 10  | 0 | 0 | 0 | 0  | 0  |
| Pentene      | kg/h              | 44  | 6   | 6   | 6   | 6   | 6   | 6   | 6   | 6   | 6   | 0   | 0   | 0   | 6   | 6   | 0 | 0 | 0 | 0  | 0  |
| n-Hexane     | kg/h              | 0   | 0   | 0   | 0   | 0   | 0   | 0   | 0   | 0   | 0   | 0   | 0   | 0   | 0   | 0   | 0 | 0 | 0 | 0  | 0  |
| i-Hexane     | kg/h              | 0   | 0   | 0   | 0   | 0   | 0   | 0   | 0   | 0   | 0   | 0   | 0   | 0   | 0   | 0   | 0 | 0 | 0 | 0  | 0  |
| Cyclohexane  | kg/h              | 115 | 57  | 57  | 57  | 58  | 58  | 58  | 57  | 57  | 57  | 0   | 0   | 0   | 57  | 57  | 0 | 0 | 0 | 0  | 0  |
| Hexene       | kg/h              | 1   | 0   | 0   | 0   | 0   | 0   | 0   | 0   | 0   | 0   | 0   | 0   | 0   | 0   | 0   | 0 | 0 | 0 | 0  | 0  |
| n-Octane     | kg/h              | 0   | 0   | 0   | 0   | 0   | 0   | 0   | 0   | 0   | 0   | 0   | 0   | 0   | 0   | 0   | 0 | 0 | 0 | 0  | 0  |
| i-Octane     | kg/h              | 0   | 0   | 0   | 0   | 0   | 0   | 0   | 0   | 0   | 0   | 0   | 0   | 0   | 0   | 0   | 0 | 0 | 0 | 0  | 0  |
| Octene       | kg/h              | 1   | 0   | 0   | 0   | 0   | 0   | 0   | 0   | 0   | 0   | 0   | 0   | 0   | 0   | 0   | 0 | 0 | 0 | 0  | 0  |
| Benzene      | kg/h              | 64  | 28  | 28  | 28  | 29  | 29  | 29  | 28  | 28  | 28  | 0   | 0   | 0   | 28  | 28  | 0 | 0 | 0 | 0  | 0  |
| Durene       | kg/h              | 5   | 5   | 5   | 5   | 5   | 5   | 5   | 5   | 5   | 5   | 0   | 0   | 0   | 5   | 5   | 0 | 0 | 0 | 0  | 0  |
| Prehnitene   | kg/h              | 0   | 0   | 0   | 0   | 0   | 0   | 0   | 0   | 0   | 0   | 0   | 0   | 0   | 0   | 0   | 0 | 0 | 0 | 0  | 0  |
| Isodurene    | kg/h              | 0   | 0   | 0   | 0   | 0   | 0   | 0   | 0   | 0   | 0   | 0   | 0   | 0   | 0   | 0   | 0 | 0 | 0 | 0  | 0  |
| n-Dodecane   | kg/h              | 0   | 0   | 0   | 0   | 106 | 106 | 106 | 106 | 106 | 106 | 3   | 3   | 3   | 103 | 103 | 0 | 0 | 0 | 0  | 0  |
| i-Dodecane   | kg/h              | 0   | 0   | 0   | 0   | 106 | 106 | 106 | 106 | 106 | 106 | 2   | 2   | 2   | 104 | 104 | 0 | 0 | 0 | 0  | 0  |
| Dodecene     | kg/h              | 234 | 233 | 233 | 233 | 23  | 23  | 23  | 23  | 23  | 23  | 0   | 0   | 0   | 23  | 23  | 0 | 0 | 0 | 0  | 0  |
| n-Hexadecane | kg/h              | 0   | 0   | 0   | 0   | 97  | 97  | 97  | 97  | 97  | 97  | 92  | 92  | 92  | 5   | 5   | 0 | 0 | 0 | 0  | 0  |
| i-Hexadecane | kg/h              | 0   | 0   | 0   | 0   | 97  | 97  | 97  | 97  | 97  | 97  | 89  | 89  | 89  | 8   | 8   | 0 | 0 | 0 | 0  | 0  |
| Hexadecene   | kg/h              | 213 | 213 | 213 | 213 | 21  | 21  | 21  | 21  | 21  | 21  | 20  | 20  | 20  | 1   | 1   | 0 | 0 | 0 | 0  | 0  |
| n-Octadecane | kg/h              | 0   | 0   | 0   | 0   | 114 | 114 | 114 | 114 | 114 | 114 | 114 | 114 | 114 | 0   | 0   | 0 | 0 | 0 | 0  | 0  |
| i-Octadecane | kg/h              | 0   | 0   | 0   | 0   | 114 | 114 | 114 | 114 | 114 | 114 | 114 | 114 | 114 | 1   | 1   | 0 | 0 | 0 | 0  | 0  |
| Octadecene   | kg/h              | 252 | 252 | 252 | 252 | 25  | 25  | 25  | 25  | 25  | 25  | 25  | 25  | 25  | 0   | 0   | 0 | 0 | 0 | 0  | 0  |
| n-Eicosane   | kg/h              | 0   | 0   | 0   | 0   | 60  | 60  | 60  | 60  | 60  | 60  | 60  | 60  | 60  | 0   | 0   | 0 | 0 | 0 | 0  | 0  |
| i-Eicosane   | kg/h              | 0   | 0   | 0   | 0   | 60  | 60  | 60  | 60  | 60  | 60  | 60  | 60  | 60  | 0   | 0   | 0 | 0 | 0 | 0  | 0  |
| Eicosene     | kg/h              | 132 | 132 | 132 | 132 | 13  | 13  | 13  | 13  | 13  | 13  | 13  | 13  | 13  | 0   | 0   | 0 | 0 | 0 | 0  | 0  |
| Hydrogen     | kg/h              | 0   | 0   | 0   | 0   | 4   | 4   | 4   | 0   | 0   | 0   | 0   | 0   | 0   | 0   | 0   | 0 | 3 | 3 | 10 | 10 |
| Volume Flow  | m <sup>3</sup> /h | 31  | 2   | 2   | 2   | 4   | 3   | 2   | 1   | 5   | 1   | 1   | 1   | 1   | 105 | 1   | 4 | 1 | 1 | 4  | 6  |

Table S8. (cont.).

| Stream                |               | 61       | 62       | 63       | 64       | 65       | 66       | 67       | 68        | 69        | 70       | 71       | 72       |
|-----------------------|---------------|----------|----------|----------|----------|----------|----------|----------|-----------|-----------|----------|----------|----------|
| Temperature           | C             | 109      | 50       | 88       | 25       | 309      | 25       | 145      | 30        | 40        | 12       | 10       | 20       |
| Pressure              | bar           | 5        | 5        | 5        | 1        | 17       | 1        | 40       | 2         | 2         | 15       | 14       | 5        |
| Molar Vapor Fraction  |               | 1        | 0        | 0        | 1        | 1        | 1        | 1        | 0         | 0         | 1        | 1        | 1        |
| Molar Liquid Fraction |               | 0        | 1        | 1        | 0        | 0        | 0        | 0        | 1         | 1         | 0        | 0        | 0        |
| <b>Mole Flows</b>     | <b>kmol/h</b> | <b>4</b> | <b>4</b> | <b>3</b> | <b>0</b> | <b>0</b> | <b>4</b> | <b>4</b> | <b>93</b> | <b>93</b> | <b>3</b> | <b>0</b> | <b>1</b> |
| Methanol              | kmol/h        | 0        | 0        | 0        | 0        | 0        | 0        | 0        | 0         | 0         | 0        | 0        | 0        |
| DME                   | kmol/h        | 0        | 0        | 0        | 0        | 0        | 0        | 0        | 0         | 0         | 0        | 0        | 0        |
| Water                 | kmol/h        | 0        | 0        | 0        | 0        | 0        | 0        | 0        | 93        | 93        | 0        | 0        | 0        |
| Methane               | kmol/h        | 0        | 0        | 0        | 0        | 0        | 0        | 0        | 0         | 0         | 1        | 0        | 0        |
| Ethane                | kmol/h        | 0        | 0        | 0        | 0        | 0        | 0        | 0        | 0         | 0         | 0        | 0        | 0        |
| Ethylene              | kmol/h        | 0        | 0        | 0        | 0        | 0        | 0        | 0        | 0         | 0         | 0        | 0        | 0        |
| Propane               | kmol/h        | 1        | 1        | 0        | 0        | 0        | 0        | 0        | 0         | 0         | 0        | 0        | 1        |
| Propylene             | kmol/h        | 0        | 0        | 0        | 0        | 0        | 0        | 0        | 0         | 0         | 1        | 0        | 0        |
| n-Butane              | kmol/h        | 0        | 0        | 0        | 0        | 0        | 0        | 0        | 0         | 0         | 0        | 0        | 0        |
| i-Butane              | kmol/h        | 0        | 0        | 0        | 0        | 0        | 0        | 0        | 0         | 0         | 0        | 0        | 0        |
| Butene                | kmol/h        | 0        | 0        | 0        | 0        | 0        | 0        | 0        | 0         | 0         | 0        | 0        | 0        |
| n-Pentane             | kmol/h        | 0        | 0        | 0        | 0        | 0        | 0        | 0        | 0         | 0         | 0        | 0        | 0        |
| i-Pentane             | kmol/h        | 0        | 0        | 0        | 0        | 0        | 0        | 0        | 0         | 0         | 0        | 0        | 0        |
| Cyclopentane          | kmol/h        | 0        | 0        | 0        | 0        | 0        | 0        | 0        | 0         | 0         | 0        | 0        | 0        |
| Pentene               | kmol/h        | 1        | 1        | 1        | 0        | 0        | 0        | 0        | 0         | 0         | 0        | 0        | 0        |
| n-Hexane              | kmol/h        | 0        | 0        | 0        | 0        | 0        | 0        | 0        | 0         | 0         | 0        | 0        | 0        |
| i-Hexane              | kmol/h        | 0        | 0        | 0        | 0        | 0        | 0        | 0        | 0         | 0         | 0        | 0        | 0        |
| Cyclohexane           | kmol/h        | 1        | 1        | 1        | 0        | 0        | 0        | 0        | 0         | 0         | 0        | 0        | 0        |
| Hexene                | kmol/h        | 0        | 0        | 0        | 0        | 0        | 0        | 0        | 0         | 0         | 0        | 0        | 0        |
| n-Octane              | kmol/h        | 0        | 0        | 0        | 0        | 0        | 0        | 0        | 0         | 0         | 0        | 0        | 0        |
| i-Octane              | kmol/h        | 0        | 0        | 0        | 0        | 0        | 0        | 0        | 0         | 0         | 0        | 0        | 0        |
| Octene                | kmol/h        | 0        | 0        | 0        | 0        | 0        | 0        | 0        | 0         | 0         | 0        | 0        | 0        |

|                   |             |            |            |            |          |          |          |          |             |             |           |          |           |
|-------------------|-------------|------------|------------|------------|----------|----------|----------|----------|-------------|-------------|-----------|----------|-----------|
| Benzene           | kmol/h      | 0          | 0          | 0          | 0        | 0        | 0        | 0        | 0           | 0           | 0         | 0        | 0         |
| Durene            | kmol/h      | 0          | 0          | 0          | 0        | 0        | 0        | 0        | 0           | 0           | 0         | 0        | 0         |
| Prehnitene        | kmol/h      | 0          | 0          | 0          | 0        | 0        | 0        | 0        | 0           | 0           | 0         | 0        | 0         |
| Isodurene         | kmol/h      | 0          | 0          | 0          | 0        | 0        | 0        | 0        | 0           | 0           | 0         | 0        | 0         |
| n-Dodecane        | kmol/h      | 0          | 0          | 0          | 0        | 0        | 0        | 0        | 0           | 0           | 0         | 0        | 0         |
| i-Dodecane        | kmol/h      | 0          | 0          | 0          | 0        | 0        | 0        | 0        | 0           | 0           | 0         | 0        | 0         |
| Dodecene          | kmol/h      | 0          | 0          | 0          | 0        | 0        | 0        | 0        | 0           | 0           | 0         | 0        | 0         |
| n-Hexadecane      | kmol/h      | 0          | 0          | 0          | 0        | 0        | 0        | 0        | 0           | 0           | 0         | 0        | 0         |
| i-Hexadecane      | kmol/h      | 0          | 0          | 0          | 0        | 0        | 0        | 0        | 0           | 0           | 0         | 0        | 0         |
| Hexadecene        | kmol/h      | 0          | 0          | 0          | 0        | 0        | 0        | 0        | 0           | 0           | 0         | 0        | 0         |
| n-Octadecane      | kmol/h      | 0          | 0          | 0          | 0        | 0        | 0        | 0        | 0           | 0           | 0         | 0        | 0         |
| i-Octadecane      | kmol/h      | 0          | 0          | 0          | 0        | 0        | 0        | 0        | 0           | 0           | 0         | 0        | 0         |
| Octadecene        | kmol/h      | 0          | 0          | 0          | 0        | 0        | 0        | 0        | 0           | 0           | 0         | 0        | 0         |
| n-Eicosane        | kmol/h      | 0          | 0          | 0          | 0        | 0        | 0        | 0        | 0           | 0           | 0         | 0        | 0         |
| i-Eicosane        | kmol/h      | 0          | 0          | 0          | 0        | 0        | 0        | 0        | 0           | 0           | 0         | 0        | 0         |
| Eicosene          | kmol/h      | 0          | 0          | 0          | 0        | 0        | 0        | 0        | 0           | 0           | 0         | 0        | 0         |
| Hydrogen          | kmol/h      | 0          | 0          | 0          | 0        | 0        | 4        | 4        | 0           | 0           | 0         | 0        | 0         |
| <b>Mass Flows</b> | <b>kg/h</b> | <b>255</b> | <b>255</b> | <b>196</b> | <b>0</b> | <b>0</b> | <b>7</b> | <b>7</b> | <b>1679</b> | <b>1679</b> | <b>98</b> | <b>0</b> | <b>59</b> |
| Methanol          | kg/h        | 0          | 0          | 0          | 0        | 0        | 0        | 0        | 0           | 0           | 0         | 0        | 0         |
| DME               | kg/h        | 0          | 0          | 0          | 0        | 0        | 0        | 0        | 0           | 0           | 0         | 0        | 0         |
| Water             | kg/h        | 8          | 8          | 7          | 0        | 0        | 0        | 0        | 1679        | 1679        | 0         | 0        | 0         |
| Methane           | kg/h        | 1          | 1          | 0          | 0        | 0        | 0        | 0        | 0           | 0           | 20        | 0        | 1         |
| Ethane            | kg/h        | 4          | 4          | 0          | 0        | 0        | 0        | 0        | 0           | 0           | 3         | 0        | 4         |
| Ethylene          | kg/h        | 0          | 0          | 0          | 0        | 0        | 0        | 0        | 0           | 0           | 12        | 0        | 0         |
| Propane           | kg/h        | 31         | 31         | 2          | 0        | 0        | 0        | 0        | 0           | 0           | 4         | 0        | 30        |
| Propylene         | kg/h        | 0          | 0          | 0          | 0        | 0        | 0        | 0        | 0           | 0           | 53        | 0        | 0         |
| n-Butane          | kg/h        | 23         | 23         | 14         | 0        | 0        | 0        | 0        | 0           | 0           | 0         | 0        | 9         |
| i-Butane          | kg/h        | 23         | 23         | 7          | 0        | 0        | 0        | 0        | 0           | 0           | 1         | 0        | 16        |
| Butene            | kg/h        | 0          | 0          | 0          | 0        | 0        | 0        | 0        | 0           | 0           | 5         | 0        | 0         |
| n-Pentane         | kg/h        | 0          | 0          | 0          | 0        | 0        | 0        | 0        | 0           | 0           | 0         | 0        | 0         |
| i-Pentane         | kg/h        | 0          | 0          | 0          | 0        | 0        | 0        | 0        | 0           | 0           | 0         | 0        | 0         |

|              |      |    |    |    |   |   |    |   |   |   |   |   |   |
|--------------|------|----|----|----|---|---|----|---|---|---|---|---|---|
| Cyclopentane | kg/h | 33 | 33 | 33 | 0 | 0 | 0  | 0 | 0 | 0 | 0 | 0 | 0 |
| Pentene      | kg/h | 38 | 38 | 38 | 0 | 0 | 0  | 0 | 0 | 0 | 0 | 0 | 0 |
| n-Hexane     | kg/h | 0  | 0  | 0  | 0 | 0 | 0  | 0 | 0 | 0 | 0 | 0 | 0 |
| i-Hexane     | kg/h | 0  | 0  | 0  | 0 | 0 | 0  | 0 | 0 | 0 | 0 | 0 | 0 |
| Cyclohexane  | kg/h | 58 | 58 | 58 | 0 | 0 | 0  | 0 | 0 | 0 | 0 | 0 | 0 |
| Hexene       | kg/h | 1  | 1  | 1  | 0 | 0 | 0  | 0 | 0 | 0 | 0 | 0 | 0 |
| n-Octane     | kg/h | 0  | 0  | 0  | 0 | 0 | 0  | 0 | 0 | 0 | 0 | 0 | 0 |
| i-Octane     | kg/h | 0  | 0  | 0  | 0 | 0 | 0  | 0 | 0 | 0 | 0 | 0 | 0 |
| Octene       | kg/h | 0  | 0  | 0  | 0 | 0 | 0  | 0 | 0 | 0 | 0 | 0 | 0 |
| Benzene      | kg/h | 35 | 35 | 35 | 0 | 0 | 0  | 0 | 0 | 0 | 0 | 0 | 0 |
| Durene       | kg/h | 0  | 0  | 0  | 0 | 0 | 0  | 0 | 0 | 0 | 0 | 0 | 0 |
| Prehnitene   | kg/h | 0  | 0  | 0  | 0 | 0 | 0  | 0 | 0 | 0 | 0 | 0 | 0 |
| Isodurene    | kg/h | 0  | 0  | 0  | 0 | 0 | 0  | 0 | 0 | 0 | 0 | 0 | 0 |
| n-Dodecane   | kg/h | 0  | 0  | 0  | 0 | 0 | 0  | 0 | 0 | 0 | 0 | 0 | 0 |
| i-Dodecane   | kg/h | 0  | 0  | 0  | 0 | 0 | 0  | 0 | 0 | 0 | 0 | 0 | 0 |
| Dodecene     | kg/h | 1  | 1  | 1  | 0 | 0 | 0  | 0 | 0 | 0 | 0 | 0 | 0 |
| n-Hexadecane | kg/h | 0  | 0  | 0  | 0 | 0 | 0  | 0 | 0 | 0 | 0 | 0 | 0 |
| i-Hexadecane | kg/h | 0  | 0  | 0  | 0 | 0 | 0  | 0 | 0 | 0 | 0 | 0 | 0 |
| Hexadecene   | kg/h | 0  | 0  | 0  | 0 | 0 | 0  | 0 | 0 | 0 | 0 | 0 | 0 |
| n-Octadecane | kg/h | 0  | 0  | 0  | 0 | 0 | 0  | 0 | 0 | 0 | 0 | 0 | 0 |
| i-Octadecane | kg/h | 0  | 0  | 0  | 0 | 0 | 0  | 0 | 0 | 0 | 0 | 0 | 0 |
| Octadecene   | kg/h | 0  | 0  | 0  | 0 | 0 | 0  | 0 | 0 | 0 | 0 | 0 | 0 |
| n-Eicosane   | kg/h | 0  | 0  | 0  | 0 | 0 | 0  | 0 | 0 | 0 | 0 | 0 | 0 |
| i-Eicosane   | kg/h | 0  | 0  | 0  | 0 | 0 | 0  | 0 | 0 | 0 | 0 | 0 | 0 |
| Eicosene     | kg/h | 0  | 0  | 0  | 0 | 0 | 0  | 0 | 0 | 0 | 0 | 0 | 0 |
| Hydrogen     | kg/h | 0  | 0  | 0  | 0 | 0 | 7  | 7 | 0 | 0 | 0 | 0 | 0 |
| Volume Flow  | m³/h | 25 | 3  | 0  | 2 | 0 | 88 | 3 | 2 | 2 | 4 | 0 | 6 |
